# Supplementary material
Source: PubMed Central journal article supplement (PMC7440797)
Supplement: AEM.00861-20-s0001.pdf [file AEM.00861-20-s0001.pdf]

## Supplementary Material

TABLE S1. Summary of sequencing of bacterial 16S rRNA grouped according to sample type and time point.

| Sample <sup>2</sup> | Time <sup>3</sup> | n | Prior to sequencing |                                         | Sequences (Total) | Prior to normalization    |                      |                          | After to normalization |                           |                      |
|---------------------|-------------------|---|---------------------|-----------------------------------------|-------------------|---------------------------|----------------------|--------------------------|------------------------|---------------------------|----------------------|
|                     |                   |   | DNA (ng/ $\mu$ L)   | Total DNA yield ( $\mu$ g) <sup>1</sup> |                   | Sequences (Mean $\pm$ SD) | OTUs (Mean $\pm$ SD) | Coverage (Mean $\pm$ SD) | Sequences (Total)      | Sequences (Mean $\pm$ SD) | OTUs (Mean $\pm$ SD) |
| BS                  | T1                | 6 | 20.54 $\pm$ 22.52   | 616.30 $\pm$ 675.47                     | 68991             | 11498.50 $\pm$ 4400.99    | 1098.83 $\pm$ 248.77 | 0.96 $\pm$ 0.01          | 36410                  | 6068.33 $\pm$ 160.80      | 963.00 $\pm$ 226.42  |
|                     | T2                | 8 | 14.95 $\pm$ 17.93   | 448.53 $\pm$ 537.78                     | 84719             | 10589.88 $\pm$ 1607.08    | 655.88 $\pm$ 322.80  | 0.98 $\pm$ 0.01          | 48704                  | 6088.00 $\pm$ 104.73      | 637.00 $\pm$ 343.45  |
|                     | T3                | 8 | 10.18 $\pm$ 12.72   | 305.45 $\pm$ 381.61                     | 84905             | 10613.12 $\pm$ 2309.19    | 448.50 $\pm$ 156.32  | 0.98 $\pm$ 0.01          | 48270                  | 6033.75 $\pm$ 68.12       | 412.62 $\pm$ 184.68  |
|                     | T4                | 8 | 26.28 $\pm$ 18.59   | 788.43 $\pm$ 557.84                     | 100017            | 12502.12 $\pm$ 4226.33    | 1008.00 $\pm$ 379.11 | 0.97 $\pm$ 0.01          | 48071                  | 6008.88 $\pm$ 86.08       | 857.50 $\pm$ 249.40  |
|                     | T5                | 8 | 14.33 $\pm$ 17.51   | 429.89 $\pm$ 525.26                     | 77074             | 9634.25 $\pm$ 2081.29     | 699.25 $\pm$ 400.44  | 0.97 $\pm$ 0.01          | 48363                  | 6045.38 $\pm$ 94.89       | 651.75 $\pm$ 348.62  |
|                     | T6                | 4 | 13.43 $\pm$ 18.90   | 402.99 $\pm$ 567.00                     | 29983             | 7495.75 $\pm$ 358.15      | 809.50 $\pm$ 363.50  | 0.96 $\pm$ 0.01          | 24405                  | 6101.25 $\pm$ 46.56       | 809.50 $\pm$ 363.50  |
| RAL                 | T1                | 8 | 650.92 $\pm$ 114.48 | 32546.02 $\pm$ 5723.95                  | 131075            | 16384.38 $\pm$ 3754.56    | 1203.75 $\pm$ 194.92 | 0.98 $\pm$ 0.01          | 47857                  | 5982.12 $\pm$ 133.81      | 907.50 $\pm$ 131.57  |
|                     | T2                | 8 | 569.52 $\pm$ 121.13 | 28475.77 $\pm$ 6056.58                  | 141771            | 17721.38 $\pm$ 4530.15    | 1230.12 $\pm$ 184.70 | 0.98 $\pm$ 0.01          | 47058                  | 5882.25 $\pm$ 79.50       | 838.88 $\pm$ 124.49  |
|                     | T3                | 8 | 416.78 $\pm$ 95.54  | 20838.80 $\pm$ 4777.00                  | 113912            | 14239.00 $\pm$ 3509.42    | 1192.50 $\pm$ 172.66 | 0.97 $\pm$ 0.01          | 48570                  | 6071.25 $\pm$ 180.75      | 990.75 $\pm$ 137.25  |
|                     | T4                | 8 | 567.11 $\pm$ 143.18 | 28355.59 $\pm$ 7159.03                  | 118150            | 14768.75 $\pm$ 5114.35    | 1175.88 $\pm$ 200.94 | 0.97 $\pm$ 0.01          | 48397                  | 6049.62 $\pm$ 142.81      | 977.75 $\pm$ 133.16  |
|                     | T5                | 8 | 537.55 $\pm$ 124.43 | 26877.74 $\pm$ 6221.69                  | 100765            | 12595.62 $\pm$ 3257.00    | 1083.00 $\pm$ 121.18 | 0.97 $\pm$ 0.01          | 48051                  | 6006.38 $\pm$ 200.24      | 897.50 $\pm$ 142.46  |
|                     | T6                | 8 | 589.64 $\pm$ 147.00 | 29482.12 $\pm$ 7349.79                  | 111456            | 13932.00 $\pm$ 5472.65    | 1103.50 $\pm$ 173.43 | 0.97 $\pm$ 0.01          | 47481                  | 5935.12 $\pm$ 161.87      | 856.62 $\pm$ 194.65  |
| RAS                 | T1                | 8 | 651.30 $\pm$ 46.83  | 32565.05 $\pm$ 2341.27                  | 285748            | 35718.50 $\pm$ 72325.79   | 1088.38 $\pm$ 496.28 | 0.97 $\pm$ 0.01          | 47830                  | 5978.75 $\pm$ 144.40      | 832.75 $\pm$ 112.90  |
|                     | T2                | 8 | 626.01 $\pm$ 117.91 | 31300.53 $\pm$ 5895.27                  | 100766            | 12595.75 $\pm$ 2851.55    | 1037.25 $\pm$ 169.40 | 0.97 $\pm$ 0.01          | 47352                  | 5919.00 $\pm$ 107.47      | 803.75 $\pm$ 149.53  |
|                     | T3                | 8 | 552.58 $\pm$ 77.28  | 27629.05 $\pm$ 3863.92                  | 93596             | 11699.50 $\pm$ 3677.48    | 1011.38 $\pm$ 173.94 | 0.97 $\pm$ 0.01          | 48549                  | 6068.62 $\pm$ 107.41      | 930.00 $\pm$ 116.91  |
|                     | T4                | 8 | 538.69 $\pm$ 75.12  | 26934.36 $\pm$ 3756.05                  | 104338            | 13042.25 $\pm$ 5455.85    | 1038.38 $\pm$ 216.27 | 0.97 $\pm$ 0.01          | 48381                  | 6047.62 $\pm$ 85.87       | 930.12 $\pm$ 178.06  |
|                     | T5                | 8 | 512.80 $\pm$ 45.91  | 25640.13 $\pm$ 2295.43                  | 83244             | 10405.50 $\pm$ 3110.43    | 959.00 $\pm$ 153.78  | 0.97 $\pm$ 0.01          | 48770                  | 6096.25 $\pm$ 111.07      | 917.50 $\pm$ 127.94  |
|                     | T6                | 8 | 533.85 $\pm$ 75.55  | 26692.69 $\pm$ 3777.66                  | 76529             | 9566.12 $\pm$ 2854.20     | 907.75 $\pm$ 141.64  | 0.97 $\pm$ 0.01          | 48175                  | 6021.88 $\pm$ 146.47      | 830.00 $\pm$ 103.19  |
| RVL                 | T1                | 7 | 564.10 $\pm$ 122.64 | 28205.00 $\pm$ 6132.18                  | 126684            | 18097.71 $\pm$ 10043.96   | 1200.71 $\pm$ 255.40 | 0.98 $\pm$ 0.01          | 41315                  | 5902.14 $\pm$ 66.71       | 831.29 $\pm$ 138.54  |
|                     | T2                | 8 | 562.40 $\pm$ 122.64 | 28120.15 $\pm$ 6132.19                  | 148868            | 18608.50 $\pm$ 5020.85    | 1238.88 $\pm$ 214.89 | 0.98 $\pm$ 0.00          | 47423                  | 5927.88 $\pm$ 45.24       | 842.38 $\pm$ 142.96  |
|                     | T3                | 8 | 474.55 $\pm$ 70.51  | 23727.53 $\pm$ 3525.48                  | 125867            | 15733.38 $\pm$ 3153.03    | 1181.75 $\pm$ 193.47 | 0.98 $\pm$ 0.00          | 47476                  | 5934.50 $\pm$ 98.97       | 843.25 $\pm$ 165.10  |
|                     | T4                | 8 | 538.49 $\pm$ 121.67 | 26924.55 $\pm$ 6083.44                  | 112302            | 14037.75 $\pm$ 4402.51    | 1162.38 $\pm$ 181.56 | 0.97 $\pm$ 0.01          | 47166                  | 5895.75 $\pm$ 123.63      | 831.38 $\pm$ 136.47  |
|                     | T5                | 8 | 573.73 $\pm$ 108.96 | 28686.67 $\pm$ 5447.87                  | 128424            | 16053.00 $\pm$ 4386.48    | 1182.75 $\pm$ 187.49 | 0.98 $\pm$ 0.01          | 47217                  | 5902.12 $\pm$ 85.91       | 823.25 $\pm$ 108.32  |
|                     | T6                | 8 | 532.81 $\pm$ 168.68 | 26640.70 $\pm$ 8433.98                  | 100150            | 12518.75 $\pm$ 3909.30    | 1063.00 $\pm$ 176.95 | 0.97 $\pm$ 0.01          | 48269                  | 6033.62 $\pm$ 149.57      | 912.50 $\pm$ 142.71  |
| RVS                 | T1                | 8 | 638.58 $\pm$ 73.60  | 31928.93 $\pm$ 3679.78                  | 113279            | 14159.88 $\pm$ 4906.35    | 1046.75 $\pm$ 243.62 | 0.98 $\pm$ 0.01          | 47868                  | 5983.50 $\pm$ 127.61      | 838.00 $\pm$ 164.77  |
|                     | T2                | 8 | 666.14 $\pm$ 46.39  | 33307.14 $\pm$ 2319.44                  | 107639            | 13454.88 $\pm$ 3884.61    | 1073.88 $\pm$ 213.81 | 0.98 $\pm$ 0.01          | 47746                  | 5968.25 $\pm$ 147.24      | 867.88 $\pm$ 150.49  |
|                     | T3                | 8 | 603.31 $\pm$ 111.16 | 30165.41 $\pm$ 5557.79                  | 95357             | 11919.62 $\pm$ 1837.64    | 1046.38 $\pm$ 169.67 | 0.97 $\pm$ 0.00          | 47868                  | 5983.50 $\pm$ 205.84      | 879.88 $\pm$ 155.16  |
|                     | T4                | 8 | 553.95 $\pm$ 74.95  | 27697.26 $\pm$ 3747.46                  | 76518             | 9564.75 $\pm$ 2040.66     | 936.12 $\pm$ 120.28  | 0.97 $\pm$ 0.01          | 48379                  | 6047.38 $\pm$ 79.20       | 899.75 $\pm$ 121.80  |
|                     | T5                | 8 | 502.22 $\pm$ 69.15  | 25111.05 $\pm$ 3457.46                  | 81654             | 10206.75 $\pm$ 2446.30    | 956.88 $\pm$ 113.38  | 0.97 $\pm$ 0.01          | 48175                  | 6021.88 $\pm$ 131.83      | 879.62 $\pm$ 134.55  |
|                     | T6                | 7 | 547.89 $\pm$ 40.61  | 27394.40 $\pm$ 2030.35                  | 60154             | 8593.43 $\pm$ 956.39      | 900.57 $\pm$ 130.62  | 0.97 $\pm$ 0.01          | 42440                  | 6062.86 $\pm$ 52.70       | 900.57 $\pm$ 130.62  |

<sup>1</sup>Total DNA yield was calculated by multiplying DNA concentration measured with the Qubit platform with final elution volume. Eluted volume for buccal swab and rumen samples was 30  $\mu$ L and 50  $\mu$ L, respectively. <sup>2</sup>BS: buccal swab, RAL: rumen anterior liquid, RAS: rumen anterior solid, RVL: rumen ventral liquid and RVS: rumen ventral solid; <sup>3</sup>Sampling was performed every 2 hours over the course of 10 hours, starting 1 hour prior to morning feeding (~ 9 AM) and ending just prior to evening feeding (~ 7 PM), totaling six time points (T1-T6).

**TABLE S2.** Summary of analysis of variance of bacterial alpha diversity.

| Alpha index             | Factor                  | numDF | denDF | F value  | P-value |
|-------------------------|-------------------------|-------|-------|----------|---------|
| Sobs <sup>1</sup>       | (Intercept)             | 1     | 160   | 43568.71 | 0.000   |
|                         | Time <sup>4</sup>       | 5     | 35    | 2.63     | 0.040   |
|                         | Class <sup>5</sup>      | 4     | 160   | 15.30    | 0.000   |
|                         | Time:Class <sup>6</sup> | 20    | 160   | 3.82     | 0.000   |
| Shannon <sup>2</sup>    | (Intercept)             | 1     | 160   | 1789.25  | 0.000   |
|                         | Time                    | 5     | 35    | 2.27     | 0.069   |
|                         | Class                   | 4     | 160   | 29.72    | 0.000   |
|                         | Time:Class              | 20    | 160   | 3.84     | 0.000   |
| Invsimpson <sup>3</sup> | (Intercept)             | 1     | 160   | 3517.45  | 0.000   |
|                         | Time                    | 5     | 35    | 2.56     | 0.044   |
|                         | Class                   | 4     | 160   | 12.30    | 0.000   |
|                         | Time:Class              | 20    | 160   | 4.95     | 0.000   |

| Index                   | Sampling Time | Mean   | SE    | lower.CL | upper.CL | Tukey HSD |
|-------------------------|---------------|--------|-------|----------|----------|-----------|
| Sobs <sup>1</sup>       | T1            | 871.27 | 46.38 | 718.56   | 1056.43  | a         |
|                         | T2            | 789.23 | 41.01 | 653.89   | 952.57   | a         |
|                         | T3            | 776.58 | 40.36 | 643.42   | 937.31   | a         |
|                         | T4            | 894.54 | 46.49 | 741.15   | 1079.69  | a         |
|                         | T5            | 824.38 | 42.84 | 683.02   | 995.00   | a         |
|                         | T6            | 856.59 | 46.80 | 702.88   | 1043.91  | a         |
| Shannon <sup>2</sup>    | T1            | 0.79   | 0.01  | 0.75     | 0.82     | NA        |
|                         | T2            | 0.77   | 0.01  | 0.74     | 0.80     | NA        |
|                         | T3            | 0.76   | 0.01  | 0.73     | 0.79     | NA        |
|                         | T4            | 0.79   | 0.01  | 0.76     | 0.83     | NA        |
|                         | T5            | 0.78   | 0.01  | 0.75     | 0.81     | NA        |
|                         | T6            | 0.77   | 0.01  | 0.73     | 0.80     | NA        |
| Invsimpson <sup>3</sup> | T1            | 56.49  | 5.66  | 39.31    | 81.17    | ab        |
|                         | T2            | 53.70  | 5.28  | 37.61    | 76.66    | ab        |
|                         | T3            | 47.03  | 4.63  | 32.94    | 67.15    | b         |
|                         | T4            | 65.41  | 6.43  | 45.82    | 93.38    | a         |
|                         | T5            | 58.00  | 5.70  | 40.62    | 82.80    | ab        |
|                         | T6            | 58.39  | 6.03  | 40.18    | 84.86    | ab        |

Continuing Table S2

| <b>Index</b>            | <b>Sample Type</b> | <b>Mean</b> | <b>SE</b> | <b>lower.CL</b> | <b>upper.CL</b> | <b>Tukey HSD</b> |
|-------------------------|--------------------|-------------|-----------|-----------------|-----------------|------------------|
| Sobs <sup>1</sup>       | BS                 | 41.40       | 3.89      | 29.85           | 57.44           | b                |
|                         | RAL                | 57.63       | 5.17      | 42.17           | 78.77           | a                |
|                         | RAS                | 64.57       | 5.79      | 47.25           | 88.25           | a                |
|                         | RVL                | 54.63       | 4.92      | 39.91           | 74.79           | a                |
|                         | RVS                | 66.76       | 6.02      | 48.77           | 91.39           | a                |
| Shannon <sup>2</sup>    | BS                 | 0.71        | 0.01      | 0.68            | 0.74            | b                |
|                         | RAL                | 0.79        | 0.01      | 0.76            | 0.82            | a                |
|                         | RAS                | 0.80        | 0.01      | 0.77            | 0.82            | a                |
|                         | RVL                | 0.79        | 0.01      | 0.76            | 0.82            | a                |
|                         | RVS                | 0.80        | 0.01      | 0.77            | 0.82            | a                |
| Invsimpson <sup>3</sup> | BS                 | 696.00      | 32.44     | 591.66          | 818.74          | b                |
|                         | RAL                | 906.79      | 39.95     | 777.74          | 1057.26         | a                |
|                         | RAS                | 868.49      | 38.26     | 744.91          | 1012.57         | a                |
|                         | RVL                | 843.50      | 37.39     | 722.78          | 984.37          | a                |
|                         | RVS                | 874.46      | 38.77     | 749.30          | 1020.53         | a                |

| <b>Index</b>      | <b>Sampling Time</b> | <b>Sample Type</b> | <b>Mean</b> | <b>SE</b> | <b>lower.C</b> | <b>upper.CL</b> | <b>TukeyHSD</b> |
|-------------------|----------------------|--------------------|-------------|-----------|----------------|-----------------|-----------------|
| Sobs <sup>1</sup> | T1                   | BS                 | 76.12       | 13.84     | 40.4           | 143.5           | a               |
|                   | T1                   | RAL                | 64.71       | 10.45     | 36.9           | 113.6           | ab              |
|                   | T1                   | RAS                | 48.12       | 7.76      | 27.4           | 84.4            | ab              |
|                   | T1                   | RVL                | 63.73       | 10.88     | 35.2           | 115.5           | ab              |
|                   | T1                   | RVS                | 38.07       | 6.14      | 21.7           | 66.8            | b               |
|                   | T2                   | BS                 | 35.25       | 5.69      | 20.1           | 61.9            | b               |
|                   | T2                   | RAL                | 60.28       | 9.74      | 34.3           | 105.8           | ab              |
|                   | T2                   | RAS                | 55.2        | 8.91      | 31.4           | 96.9            | ab              |
|                   | T2                   | RVL                | 58.16       | 9.39      | 33.1           | 102.1           | ab              |
|                   | T2                   | RVS                | 65.44       | 10.57     | 37.3           | 114.9           | a               |
|                   | T3                   | BS                 | 18.17       | 2.93      | 10.3           | 31.9            | c               |
|                   | T3                   | RAL                | 52.29       | 8.44      | 29.8           | 91.8            | ab              |
|                   | T3                   | RAS                | 71.85       | 11.6      | 40.9           | 126.1           | ab              |
|                   | T3                   | RVL                | 41.23       | 6.66      | 23.5           | 72.4            | b               |
|                   | T3                   | RVS                | 81.79       | 13.21     | 46.6           | 143.6           | a               |
|                   | T4                   | BS                 | 69.82       | 11.28     | 39.8           | 122.6           | a               |
|                   | T4                   | RAL                | 59.38       | 9.59      | 33.8           | 104.2           | a               |
|                   | T4                   | RAS                | 74.22       | 11.99     | 42.3           | 130.3           | a               |
|                   | T4                   | RVL                | 52.84       | 8.53      | 30.1           | 92.8            | a               |
|                   | T4                   | RVS                | 73.64       | 11.89     | 42             | 129.3           | a               |
|                   | T5                   | BS                 | 40.56       | 6.55      | 23.1           | 71.2            | b               |
|                   | T5                   | RAL                | 50.25       | 8.11      | 28.6           | 88.2            | ab              |
|                   | T5                   | RAS                | 76.51       | 12.36     | 43.6           | 134.3           | a               |
|                   | T5                   | RVL                | 53.63       | 8.66      | 30.6           | 94.1            | ab              |
|                   | T5                   | RVS                | 78.46       | 12.67     | 44.7           | 137.7           | a               |
| T6                | BS                   | 36.5               | 7.92        | 17.1      | 77.7           | b               |                 |
| T6                | RAL                  | 60.23              | 9.73        | 34.3      | 105.7          | ab              |                 |

*Validating the use of bovine buccal sampling as a proxy for the rumen microbiota using a time course and random forest classification approach*

|                         |     |      |        |       |       |        |    |
|-------------------------|-----|------|--------|-------|-------|--------|----|
|                         | T6  | RAS  | 66.89  | 10.8  | 38.1  | 117.4  | ab |
|                         | T6  | RVL  | 61.39  | 9.91  | 35    | 107.8  | ab |
|                         | T6  | RVS  | 75.19  | 12.83 | 41.5  | 136.3  | a  |
| Shannon <sup>2</sup>    | T1  | BS   | 0.8    | 0.02  | 0.7   | 0.9    | a  |
|                         | T1  | RAL  | 0.8    | 0.02  | 0.7   | 0.9    | a  |
|                         | T1  | RAS  | 0.77   | 0.02  | 0.7   | 0.8    | a  |
|                         | T1  | RVL  | 0.8    | 0.02  | 0.7   | 0.9    | a  |
|                         | T1  | RVS  | 0.76   | 0.02  | 0.7   | 0.8    | a  |
|                         | T2  | BS   | 0.7    | 0.02  | 0.6   | 0.8    | b  |
|                         | T2  | RAL  | 0.79   | 0.02  | 0.7   | 0.9    | a  |
|                         | T2  | RAS  | 0.79   | 0.02  | 0.7   | 0.9    | a  |
|                         | T2  | RVL  | 0.79   | 0.02  | 0.7   | 0.9    | a  |
|                         | T2  | RVS  | 0.79   | 0.02  | 0.7   | 0.9    | a  |
|                         | T3  | BS   | 0.64   | 0.01  | 0.6   | 0.7    | b  |
|                         | T3  | RAL  | 0.79   | 0.02  | 0.7   | 0.8    | a  |
|                         | T3  | RAS  | 0.8    | 0.02  | 0.7   | 0.9    | a  |
|                         | T3  | RVL  | 0.77   | 0.02  | 0.7   | 0.8    | a  |
|                         | T3  | RVS  | 0.81   | 0.02  | 0.8   | 0.9    | a  |
|                         | T4  | BS   | 0.77   | 0.02  | 0.7   | 0.8    | a  |
|                         | T4  | RAL  | 0.79   | 0.02  | 0.7   | 0.9    | a  |
|                         | T4  | RAS  | 0.8    | 0.02  | 0.7   | 0.9    | a  |
|                         | T4  | RVL  | 0.79   | 0.02  | 0.7   | 0.9    | a  |
|                         | T4  | RVS  | 0.8    | 0.02  | 0.7   | 0.9    | a  |
|                         | T5  | BS   | 0.71   | 0.02  | 0.7   | 0.8    | b  |
|                         | T5  | RAL  | 0.78   | 0.02  | 0.7   | 0.8    | a  |
|                         | T5  | RAS  | 0.81   | 0.02  | 0.7   | 0.9    | a  |
|                         | T5  | RVL  | 0.79   | 0.02  | 0.7   | 0.9    | a  |
|                         | T5  | RVS  | 0.81   | 0.02  | 0.7   | 0.9    | a  |
| T6                      | BS  | 0.67 | 0.02   | 0.6   | 0.7   | b      |    |
| T6                      | RAL | 0.79 | 0.02   | 0.7   | 0.9   | a      |    |
| T6                      | RAS | 0.8  | 0.02   | 0.7   | 0.9   | a      |    |
| T6                      | RVL | 0.79 | 0.02   | 0.7   | 0.9   | a      |    |
| T6                      | RVS | 0.8  | 0.02   | 0.7   | 0.9   | a      |    |
| Invsimpson <sup>3</sup> | T1  | BS   | 963.73 | 92.98 | 688.6 | 1348.8 | a  |
|                         | T1  | RAL  | 906.29 | 77.14 | 673.7 | 1219.2 | a  |
|                         | T1  | RAS  | 827.87 | 70.37 | 615.7 | 1113.2 | a  |
|                         | T1  | RVL  | 834.35 | 75.06 | 609.8 | 1141.5 | a  |
|                         | T1  | RVS  | 832.19 | 70.74 | 618.9 | 1119   | a  |
|                         | T2  | BS   | 636.49 | 54.18 | 473.1 | 856.3  | a  |
|                         | T2  | RAL  | 835.31 | 71.11 | 620.9 | 1123.7 | a  |
|                         | T2  | RAS  | 796.51 | 67.8  | 592.1 | 1071.5 | a  |
|                         | T2  | RVL  | 836.82 | 71.23 | 622   | 1125.8 | a  |
|                         | T2  | RVS  | 864.07 | 73.55 | 642.3 | 1162.4 | a  |
|                         | T3  | BS   | 419.48 | 35.71 | 311.8 | 564.3  | b  |
|                         | T3  | RAL  | 990.54 | 84.32 | 736.3 | 1332.6 | a  |
|                         | T3  | RAS  | 927.94 | 78.99 | 689.8 | 1248.3 | a  |
|                         | T3  | RVL  | 837.04 | 71.25 | 622.2 | 1126.1 | a  |
|                         | T3  | RVS  | 875.15 | 74.5  | 650.5 | 1177.3 | a  |

*Validating the use of bovine buccal sampling as a proxy for the rumen microbiota using a time course and random forest classification approach*

|    |     |        |       |       |        |    |
|----|-----|--------|-------|-------|--------|----|
| T4 | BS  | 859.53 | 73.17 | 638.9 | 1156.3 | a  |
| T4 | RAL | 974.79 | 82.98 | 724.6 | 1311.4 | a  |
| T4 | RAS | 922.63 | 78.54 | 685.8 | 1241.2 | a  |
| T4 | RVL | 827.32 | 70.43 | 615   | 1113   | a  |
| T4 | RVS | 895.65 | 76.24 | 665.8 | 1204.9 | a  |
| T5 | BS  | 645.29 | 54.93 | 479.7 | 868.1  | b  |
| T5 | RAL | 896.89 | 76.35 | 666.7 | 1206.6 | a  |
| T5 | RAS | 915.7  | 77.95 | 680.7 | 1231.9 | a  |
| T5 | RVL | 819.16 | 69.73 | 608.9 | 1102   | ab |
| T5 | RVS | 877.04 | 74.66 | 651.9 | 1179.9 | ab |
| T6 | BS  | 796.47 | 92.31 | 531.9 | 1192.7 | a  |
| T6 | RAL | 848.02 | 72.19 | 630.4 | 1140.8 | a  |
| T6 | RAS | 830.1  | 70.66 | 617   | 1116.7 | a  |
| T6 | RVL | 909.35 | 77.41 | 675.9 | 1223.3 | a  |
| T6 | RVS | 904.55 | 81.56 | 660.7 | 1238.5 | a  |

<sup>1</sup>Number of observed OTUs, <sup>2</sup>Shannon's evenness; <sup>3</sup>inverse of the Simpson diversity index; <sup>4</sup>Sampling was performed every 2 hours over the course of 10 hours, starting 1 hour prior to morning feeding (~9 AM) and ending just prior to evening feeding (~7 PM), totaling six time points (T1-T6). <sup>5</sup>BS: buccal swab, RAL: rumen anterior liquid, RAS: rumen anterior solid, RVL: rumen ventral liquid and RVS: rumen ventral solid; <sup>6</sup> Interaction terms: Sampling time vs Sample type. Means between groups in the row (class, time or interaction sample type within sampling time) followed by the same letter are not significantly different ( $P > 0.05$ ) by Tukey HSD test. NA: not available, post hoc was not performed due to lack of overall statistically significant.

**TABLE S3.** Beta diversity analysis: summary of the permutational multivariate analysis of variance (PERMANOVA nperm=1000) of Bray-Curtis dissimilarities in the bacterial community.

| <b>PERMANOVA- adonis model</b> |           |                   |                      |          |                  |
|--------------------------------|-----------|-------------------|----------------------|----------|------------------|
| <b>Factor</b>                  | <b>Df</b> | <b>Sum Of Sqs</b> | <b>R<sup>2</sup></b> | <b>F</b> | <b>Pr(&gt;F)</b> |
| Time                           | 5         | 1.724             | 0.04462              | 3.1937   | 0.000999         |
| Sample type                    | 4         | 10.986            | 0.28425              | 25.4349  | 0.000999         |
| Time*Sample type               | 20        | 4.126             | 0.10675              | 1.9104   | 0.000999         |
| Residual                       | 202       | 21.811            | 0.56438              |          |                  |
| Total                          | 231       | 38.647            | 1.00000              |          |                  |

  

| <b>PERMANOVA- pairwise adonis</b>     |                  |                |                      |                |                    |
|---------------------------------------|------------------|----------------|----------------------|----------------|--------------------|
| <b>Pairs: Sample Type<sup>1</sup></b> | <b>SumsOfSqs</b> | <b>F.Model</b> | <b>R<sup>2</sup></b> | <b>P-value</b> | <b>P-adjusted*</b> |
| BS vs RAL                             | 5.742            | 31.734         | 0.265                | 0.001          | 0.010              |
| BS vs RAS                             | 5.064            | 28.353         | 0.244                | 0.001          | 0.010              |
| BS vs RVL                             | 5.821            | 32.218         | 0.270                | 0.001          | 0.010              |
| BS vs RVS                             | 5.049            | 28.222         | 0.245                | 0.001          | 0.010              |
| RAL vs RAS                            | 1.634            | 19.198         | 0.170                | 0.001          | 0.010              |
| RAL vs RVL                            | 0.045            | 0.522          | 0.006                | 0.916          | 1.000              |
| RAL vs RVS                            | 1.706            | 20.210         | 0.179                | 0.001          | 0.010              |
| RAS vs RVL                            | 1.706            | 20.346         | 0.180                | 0.001          | 0.010              |
| RAS vs RVS                            | 0.029            | 0.348          | 0.004                | 0.987          | 1.000              |
| RVL vs RVS                            | 1.764            | 21.228         | 0.187                | 0.001          | 0.010              |

  

| <b>Pairs: Time<sup>2</sup></b> |       |       |       |       |       |
|--------------------------------|-------|-------|-------|-------|-------|
|                                |       |       |       |       |       |
| T1 vs T2                       | 0.236 | 1.524 | 0.020 | 0.135 | 0.208 |
| T1 vs T3                       | 0.950 | 5.530 | 0.069 | 0.001 | 0.007 |
| T1 vs T4                       | 0.314 | 2.496 | 0.032 | 0.005 | 0.019 |
| T1 vs T5                       | 0.526 | 3.477 | 0.044 | 0.004 | 0.019 |
| T1 vs T6                       | 0.204 | 1.692 | 0.024 | 0.061 | 0.131 |
| T2 vs T3                       | 0.353 | 1.713 | 0.021 | 0.139 | 0.208 |
| T2 vs T4                       | 0.247 | 1.524 | 0.019 | 0.158 | 0.215 |
| T2 vs T5                       | 0.217 | 1.165 | 0.015 | 0.252 | 0.315 |
| T2 vs T6                       | 0.286 | 1.790 | 0.024 | 0.058 | 0.131 |
| T3 vs T4                       | 0.467 | 2.613 | 0.032 | 0.039 | 0.117 |
| T3 vs T5                       | 0.178 | 0.879 | 0.011 | 0.415 | 0.478 |
| T3 vs T6                       | 0.709 | 4.002 | 0.052 | 0.001 | 0.007 |
| T4 vs T5                       | 0.134 | 0.847 | 0.011 | 0.514 | 0.551 |
| T4 vs T6                       | 0.102 | 0.789 | 0.011 | 0.694 | 0.694 |
| T5 vs T6                       | 0.256 | 1.642 | 0.022 | 0.102 | 0.191 |

  

| <b>Pairs: Sample type within Time</b> |       |       |       |       |       |
|---------------------------------------|-------|-------|-------|-------|-------|
|                                       |       |       |       |       |       |
| T1:BS vs T1:RAL                       | 0.422 | 3.902 | 0.245 | 0.001 | 0.002 |
| T1:BS vs T1:RAS                       | 0.199 | 1.775 | 0.129 | 0.043 | 0.054 |
| T1:BS vs T1:RVL                       | 0.417 | 3.674 | 0.250 | 0.001 | 0.002 |
| T1:BS vs T1:RVS                       | 0.229 | 2.098 | 0.149 | 0.013 | 0.017 |
| T1:RAL vs T1:RAS                      | 0.415 | 4.982 | 0.262 | 0.001 | 0.002 |
| T1:RAL vs T1:RVL                      | 0.021 | 0.250 | 0.019 | 0.987 | 0.994 |
| T1:RAL vs T1:RVS                      | 0.456 | 5.663 | 0.288 | 0.001 | 0.002 |
| T1:RAS vs T1:RVL                      | 0.426 | 4.973 | 0.277 | 0.001 | 0.002 |
| T1:RAS vs T1:RVS                      | 0.018 | 0.217 | 0.015 | 0.990 | 0.994 |
| T1:RVL vs T1:RVS                      | 0.463 | 5.587 | 0.301 | 0.001 | 0.002 |
| T2:BS vs T2:RAL                       | 1.268 | 5.990 | 0.300 | 0.002 | 0.003 |
| T2:BS vs T2:RAS                       | 1.187 | 5.757 | 0.291 | 0.002 | 0.003 |
| T2:BS vs T2:RVL                       | 1.287 | 6.094 | 0.303 | 0.002 | 0.003 |
| T2:BS vs T2:RVS                       | 1.188 | 5.776 | 0.292 | 0.001 | 0.002 |

*Validating the use of bovine buccal sampling as a proxy for the rumen microbiota using a time course and random forest classification approach*

|                  |       |        |       |       |       |
|------------------|-------|--------|-------|-------|-------|
| T2:RAL vs T2:RAS | 0.371 | 4.092  | 0.226 | 0.001 | 0.002 |
| T2:RAL vs T2:RVL | 0.013 | 0.135  | 0.010 | 0.994 | 0.994 |
| T2:RAL vs T2:RVS | 0.361 | 4.001  | 0.222 | 0.001 | 0.002 |
| T2:RAS vs T2:RVL | 0.388 | 4.304  | 0.235 | 0.002 | 0.003 |
| T2:RAS vs T2:RVS | 0.018 | 0.212  | 0.015 | 0.989 | 0.994 |
| T2:RVL vs T2:RVS | 0.376 | 4.188  | 0.230 | 0.001 | 0.002 |
| T3:BS vs T3:RAL  | 3.181 | 43.392 | 0.756 | 0.002 | 0.003 |
| T3:BS vs T3:RAS  | 3.200 | 42.116 | 0.751 | 0.001 | 0.002 |
| T3:BS vs T3:RVL  | 3.218 | 43.413 | 0.756 | 0.001 | 0.002 |
| T3:BS vs T3:RVS  | 3.247 | 46.646 | 0.769 | 0.001 | 0.002 |
| T3:RAL vs T3:RAS | 0.473 | 5.530  | 0.283 | 0.001 | 0.002 |
| T3:RAL vs T3:RVL | 0.038 | 0.451  | 0.031 | 0.935 | 0.994 |
| T3:RAL vs T3:RVS | 0.467 | 5.910  | 0.297 | 0.001 | 0.002 |
| T3:RAS vs T3:RVL | 0.488 | 5.651  | 0.288 | 0.002 | 0.003 |
| T3:RAS vs T3:RVS | 0.026 | 0.319  | 0.022 | 0.993 | 0.994 |
| T3:RVL vs T3:RVS | 0.475 | 5.942  | 0.298 | 0.001 | 0.002 |
| T4:BS vs T4:RAL  | 0.592 | 3.557  | 0.203 | 0.001 | 0.002 |
| T4:BS vs T4:RAS  | 0.448 | 2.758  | 0.165 | 0.001 | 0.002 |
| T4:BS vs T4:RVL  | 0.583 | 3.461  | 0.198 | 0.002 | 0.003 |
| T4:BS vs T4:RVS  | 0.445 | 2.679  | 0.161 | 0.001 | 0.002 |
| T4:RAL vs T4:RAS | 0.255 | 3.375  | 0.194 | 0.001 | 0.002 |
| T4:RAL vs T4:RVL | 0.027 | 0.331  | 0.023 | 0.980 | 0.994 |
| T4:RAL vs T4:RVS | 0.289 | 3.650  | 0.207 | 0.001 | 0.002 |
| T4:RAS vs T4:RVL | 0.244 | 3.138  | 0.183 | 0.001 | 0.002 |
| T4:RAS vs T4:RVS | 0.024 | 0.321  | 0.022 | 0.990 | 0.994 |
| T4:RVL vs T4:RVS | 0.269 | 3.296  | 0.191 | 0.002 | 0.003 |
| T5:BS vs T5:RAL  | 1.551 | 8.337  | 0.373 | 0.001 | 0.002 |
| T5:BS vs T5:RAS  | 1.494 | 8.381  | 0.374 | 0.001 | 0.002 |
| T5:BS vs T5:RVL  | 1.629 | 9.283  | 0.399 | 0.001 | 0.002 |
| T5:BS vs T5:RVS  | 1.495 | 8.441  | 0.376 | 0.001 | 0.002 |
| T5:RAL vs T5:RAS | 0.271 | 3.172  | 0.185 | 0.001 | 0.002 |
| T5:RAL vs T5:RVL | 0.024 | 0.286  | 0.020 | 0.988 | 0.994 |
| T5:RAL vs T5:RVS | 0.310 | 3.686  | 0.208 | 0.001 | 0.002 |
| T5:RAS vs T5:RVL | 0.290 | 3.877  | 0.217 | 0.001 | 0.002 |
| T5:RAS vs T5:RVS | 0.021 | 0.276  | 0.019 | 0.992 | 0.994 |
| T5:RVL vs T5:RVS | 0.326 | 4.420  | 0.240 | 0.001 | 0.002 |
| T6:BS vs T6:RAL  | 0.554 | 3.862  | 0.279 | 0.003 | 0.004 |
| T6:BS vs T6:RAS  | 0.478 | 3.625  | 0.266 | 0.004 | 0.005 |
| T6:BS vs T6:RVL  | 0.572 | 4.094  | 0.290 | 0.003 | 0.004 |
| T6:BS vs T6:RVS  | 0.432 | 3.063  | 0.254 | 0.003 | 0.004 |
| T6:RAL vs T6:RAS | 0.231 | 2.682  | 0.161 | 0.001 | 0.002 |
| T6:RAL vs T6:RVL | 0.036 | 0.390  | 0.027 | 0.965 | 0.994 |
| T6:RAL vs T6:RVS | 0.221 | 2.477  | 0.160 | 0.002 | 0.003 |
| T6:RAS vs T6:RVL | 0.276 | 3.308  | 0.191 | 0.001 | 0.002 |
| T6:RAS vs T6:RVS | 0.027 | 0.335  | 0.025 | 0.978 | 0.994 |
| T6:RVL vs T6:RVS | 0.249 | 2.887  | 0.182 | 0.001 | 0.002 |

BS: buccal swab, RAL: rumen anterior liquid, RAS: rumen anterior solid, RVL: rumen ventral liquid and RVS: rumen ventral solid; <sup>2</sup>Sampling was performed every 2 hours over the course of 10 hours, starting 1 hour prior to morning feeding (~ 9 AM) and ending just prior to evening feeding (~ 7 PM), totaling six time points (T1-T6); \*P-value adjusted by Benjamini-Hochberg correction method.

**TABLE S4.** Performance of Random Forest (5 classes) according to tuning methods

| Method                     | Sample <sup>2</sup> | Sensitivity | Specificity | Precision | Recall | F1   | B. Accuracy <sup>3</sup> |
|----------------------------|---------------------|-------------|-------------|-----------|--------|------|--------------------------|
| <b>Default<sup>1</sup></b> | BS                  | 1.00        | 1.00        | 1.00      | 1.00   | 1.00 | 1.00                     |
|                            | RAL                 | 0.60        | 0.89        | 0.60      | 0.60   | 0.60 | 0.75                     |
|                            | RAS                 | 0.27        | 0.83        | 0.23      | 0.27   | 0.25 | 0.55                     |
|                            | RVL                 | 0.54        | 0.89        | 0.54      | 0.54   | 0.54 | 0.72                     |
|                            | RVS                 | 0.33        | 0.85        | 0.38      | 0.33   | 0.36 | 0.59                     |
| <b>Random</b>              | BS                  | 0.88        | 1.00        | 1.00      | 0.88   | 0.93 | 0.94                     |
|                            | RAL                 | 0.67        | 0.84        | 0.53      | 0.67   | 0.59 | 0.75                     |
|                            | RAS                 | 0.55        | 0.83        | 0.38      | 0.55   | 0.44 | 0.69                     |
|                            | RVL                 | 0.31        | 0.91        | 0.44      | 0.31   | 0.36 | 0.61                     |
|                            | RVS                 | 0.47        | 0.91        | 0.58      | 0.47   | 0.52 | 0.69                     |
| <b>Ranger</b>              | BS                  | 1.00        | 1.00        | 1.00      | 1.00   | 1.00 | 1.00                     |
|                            | RAL                 | 0.47        | 0.84        | 0.44      | 0.47   | 0.45 | 0.65                     |
|                            | RAS                 | 0.45        | 0.83        | 0.33      | 0.45   | 0.38 | 0.64                     |
|                            | RVL                 | 0.31        | 0.86        | 0.33      | 0.31   | 0.32 | 0.58                     |
|                            | RVS                 | 0.33        | 0.89        | 0.45      | 0.33   | 0.38 | 0.61                     |
| <b>Gridsearch</b>          | BS                  | 0.94        | 1.00        | 1.00      | 0.94   | 0.97 | 0.97                     |
|                            | RAL                 | 0.53        | 0.82        | 0.44      | 0.53   | 0.48 | 0.68                     |
|                            | RAS                 | 0.55        | 0.83        | 0.38      | 0.55   | 0.44 | 0.69                     |
|                            | RVL                 | 0.23        | 0.88        | 0.30      | 0.23   | 0.26 | 0.55                     |
|                            | RVS                 | 0.40        | 0.91        | 0.55      | 0.40   | 0.46 | 0.65                     |

<sup>1</sup>Non tuning was applied; <sup>2</sup>BS: buccal swab, RAL: rumen anterior liquid, RAS: rumen anterior solid, RVL: rumen ventral liquid and RVS: rumen ventral solid; <sup>3</sup>Balanced accuracy.

**TABLE S5.** Performance of Random Forest (3 classes) by sample type using different re-sampling methods

| Method                     | Sample <sup>5</sup> | Sensitivity | Specificity | Precision | Recall | F1    | B. Accuracy |
|----------------------------|---------------------|-------------|-------------|-----------|--------|-------|-------------|
| <b>Default<sup>1</sup></b> | BS                  | 0.833       | 1.000       | 1.000     | 0.833  | 0.909 | 0.917       |
|                            | RL                  | 1.000       | 1.000       | 1.000     | 1.000  | 1.000 | 1.000       |
|                            | RS                  | 1.000       | 0.950       | 0.933     | 1.000  | 0.966 | 0.975       |
| <b>Up<sup>2</sup></b>      | BS                  | 0.833       | 1.000       | 1.000     | 0.833  | 0.909 | 0.917       |
|                            | RL                  | 1.000       | 1.000       | 1.000     | 1.000  | 1.000 | 1.000       |
|                            | RS                  | 1.000       | 0.950       | 0.933     | 1.000  | 0.966 | 0.975       |
| <b>Down<sup>3</sup></b>    | BS                  | 0.833       | 1.000       | 1.000     | 0.833  | 0.909 | 0.917       |
|                            | RL                  | 1.000       | 1.000       | 1.000     | 1.000  | 1.000 | 1.000       |
|                            | RS                  | 1.000       | 0.950       | 0.933     | 1.000  | 0.966 | 0.975       |
| <b>SMOTE<sup>4</sup></b>   | BS                  | 0.917       | 1.000       | 1.000     | 0.917  | 0.957 | 0.958       |
|                            | RL                  | 1.000       | 1.000       | 1.000     | 1.000  | 1.000 | 1.000       |
|                            | RS                  | 1.000       | 0.975       | 0.966     | 1.000  | 0.982 | 0.988       |

<sup>1</sup>Non re-sampling was applied; <sup>2</sup>over-sampling of the minority class, <sup>3</sup>under-sampling of the majority class, <sup>4</sup>Synthetic Minority Oversampling Technique: combination of up and down re-sampling methods (Chawla et al., 2002. <https://doi.org/10.1613/jair.953>); <sup>5</sup>BS= buccal swab, rumen samples were merged based on rumen content strata: RL=rumen liquids (RAL +RVL) and RS=rumen solids (RAS+RVS).



Validating the use of bovine buccal sampling as a proxy for the rumen microbiota using a time course and random forest classification approach

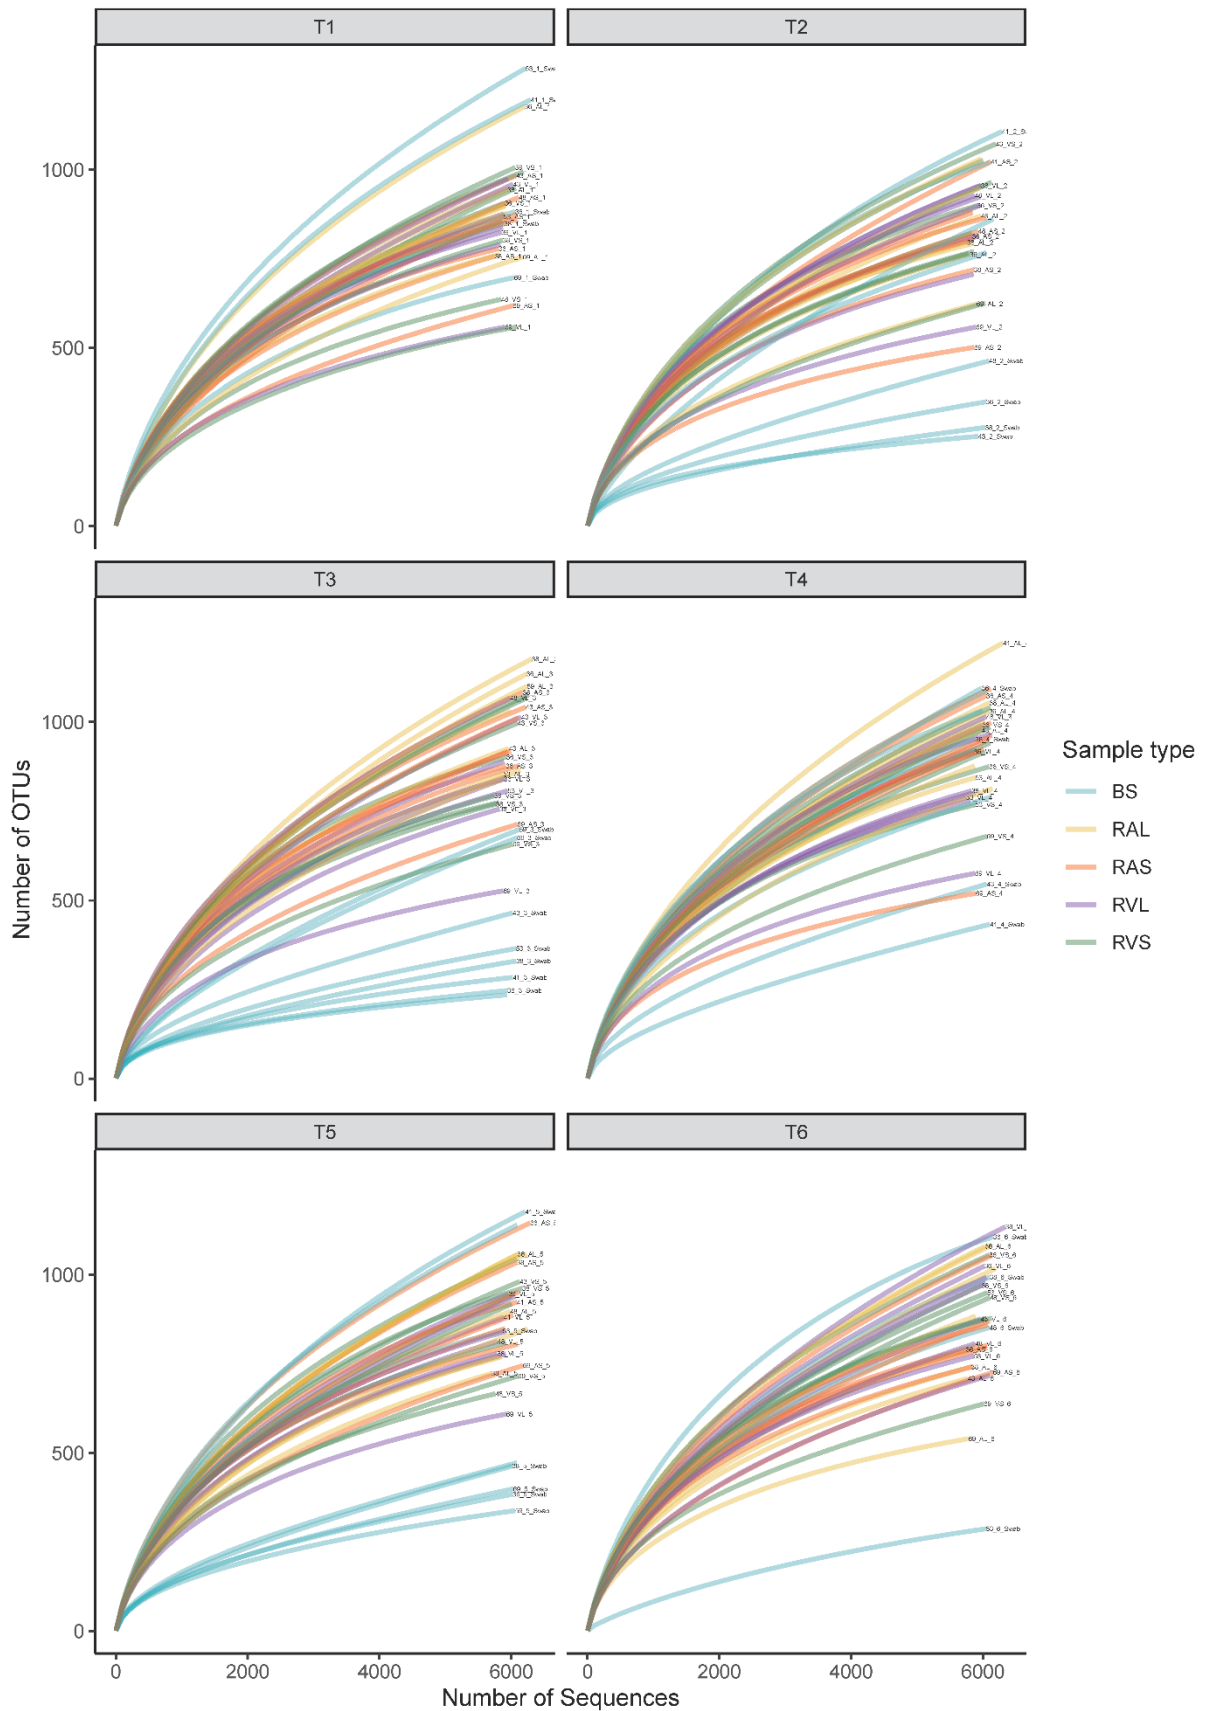

**FIG S1.** Rarefaction curves based on observed species (Number of OTUs) showing the depth of coverage (Number of Sequences) for each sample grouped according to sample type (BS: buccal swab, RAL: rumen anterior liquid, RAS: rumen anterior solid, RVL: rumen ventral liquid and RVS: rumen ventral solid) in each facet that represents

*Validating the use of bovine buccal sampling as a proxy for the rumen microbiota using a time course and random forest classification approach*

sampling time (T1-T6). Sampling was performed every 2 hours over the course of 10 hours, starting 1 hour prior to morning feeding (T1≈ 9 AM) and ending just prior to evening feeding (T6≈ 7 PM).

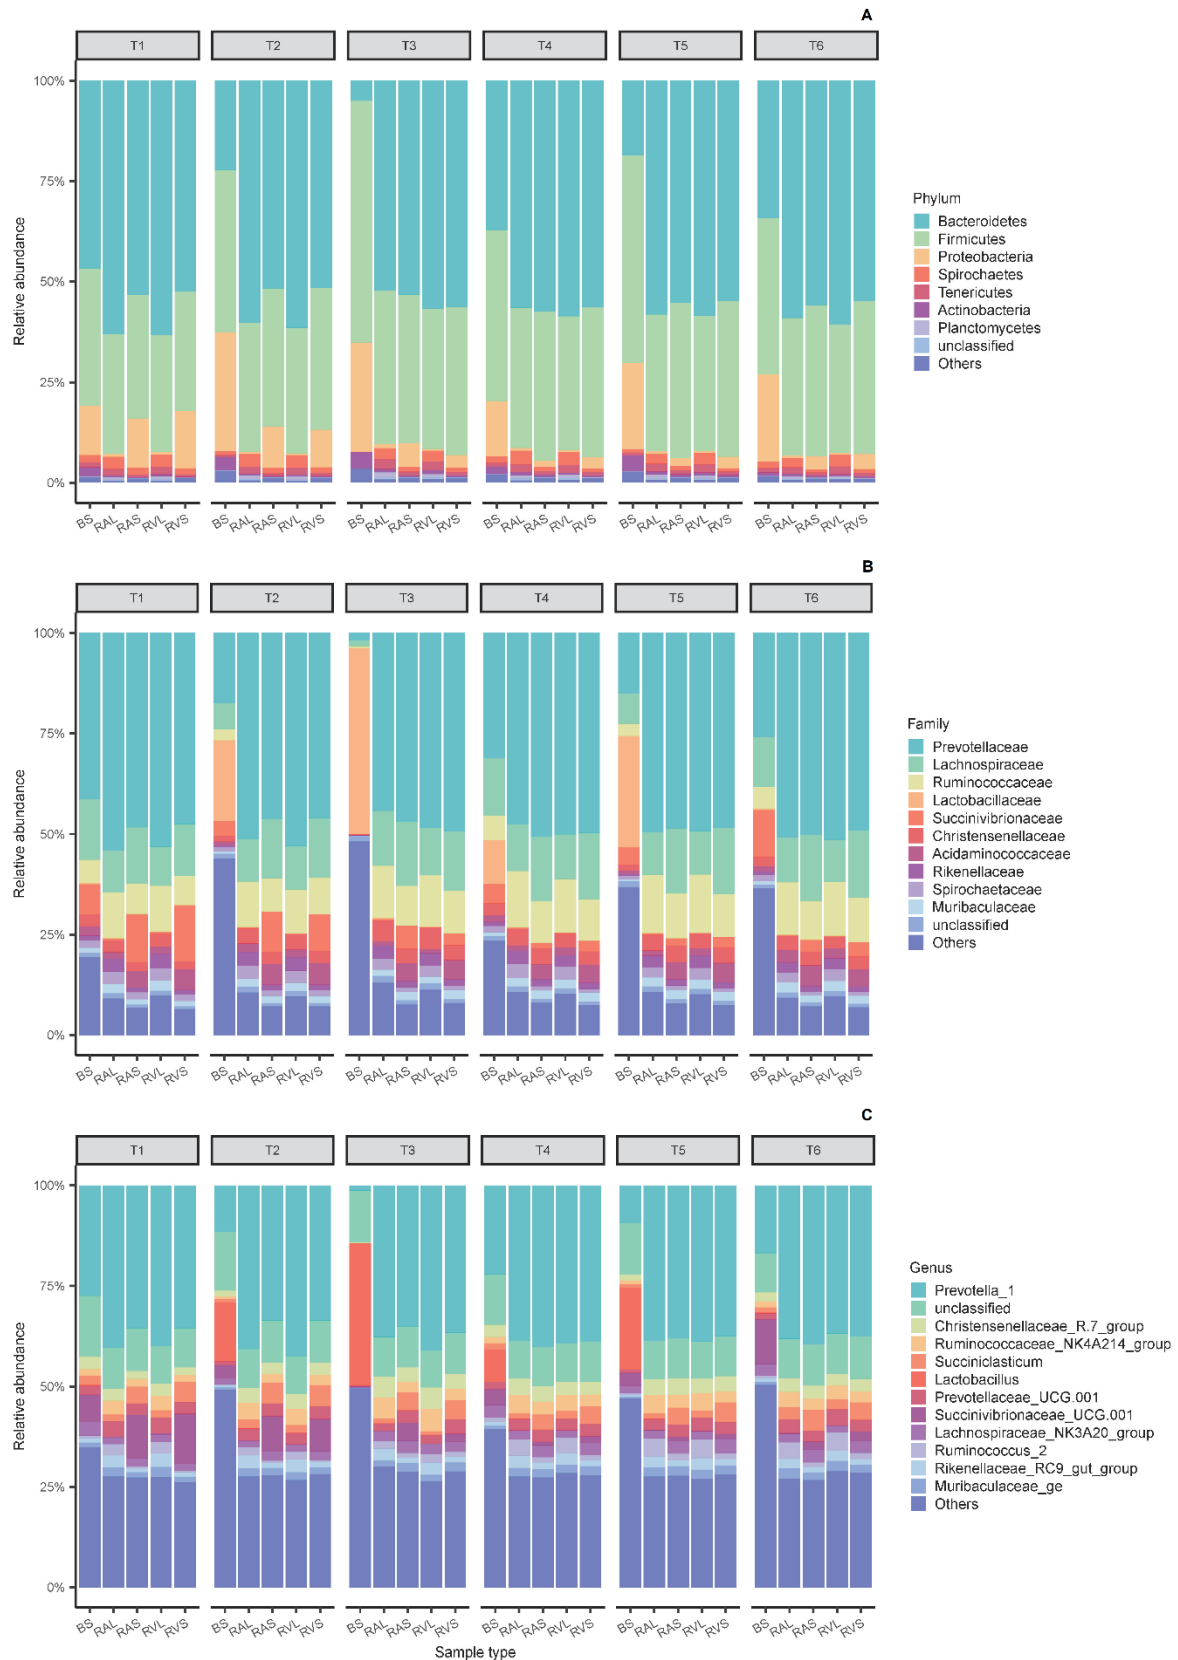

**FIG S2.** Distribution of the most abundant bacterial taxa (OTUs summarized at phylum (A), family (B), and genus (C) according to sample type (BS: buccal swab, RAL: rumen anterior liquid, RAS: rumen anterior solid, RVL: rumen

*Validating the use of bovine buccal sampling as a proxy for the rumen microbiota using a time course and random forest classification approach*

ventral liquid and RVS: rumen ventral solid) and sampling time (T1-T6). Sampling was performed every 2 hours over the course of 10 hours, starting 1 hour prior to morning feeding (T1= $\sim$  9 AM) and ending just prior to evening feeding (T6= $\sim$  7 PM).

**A**

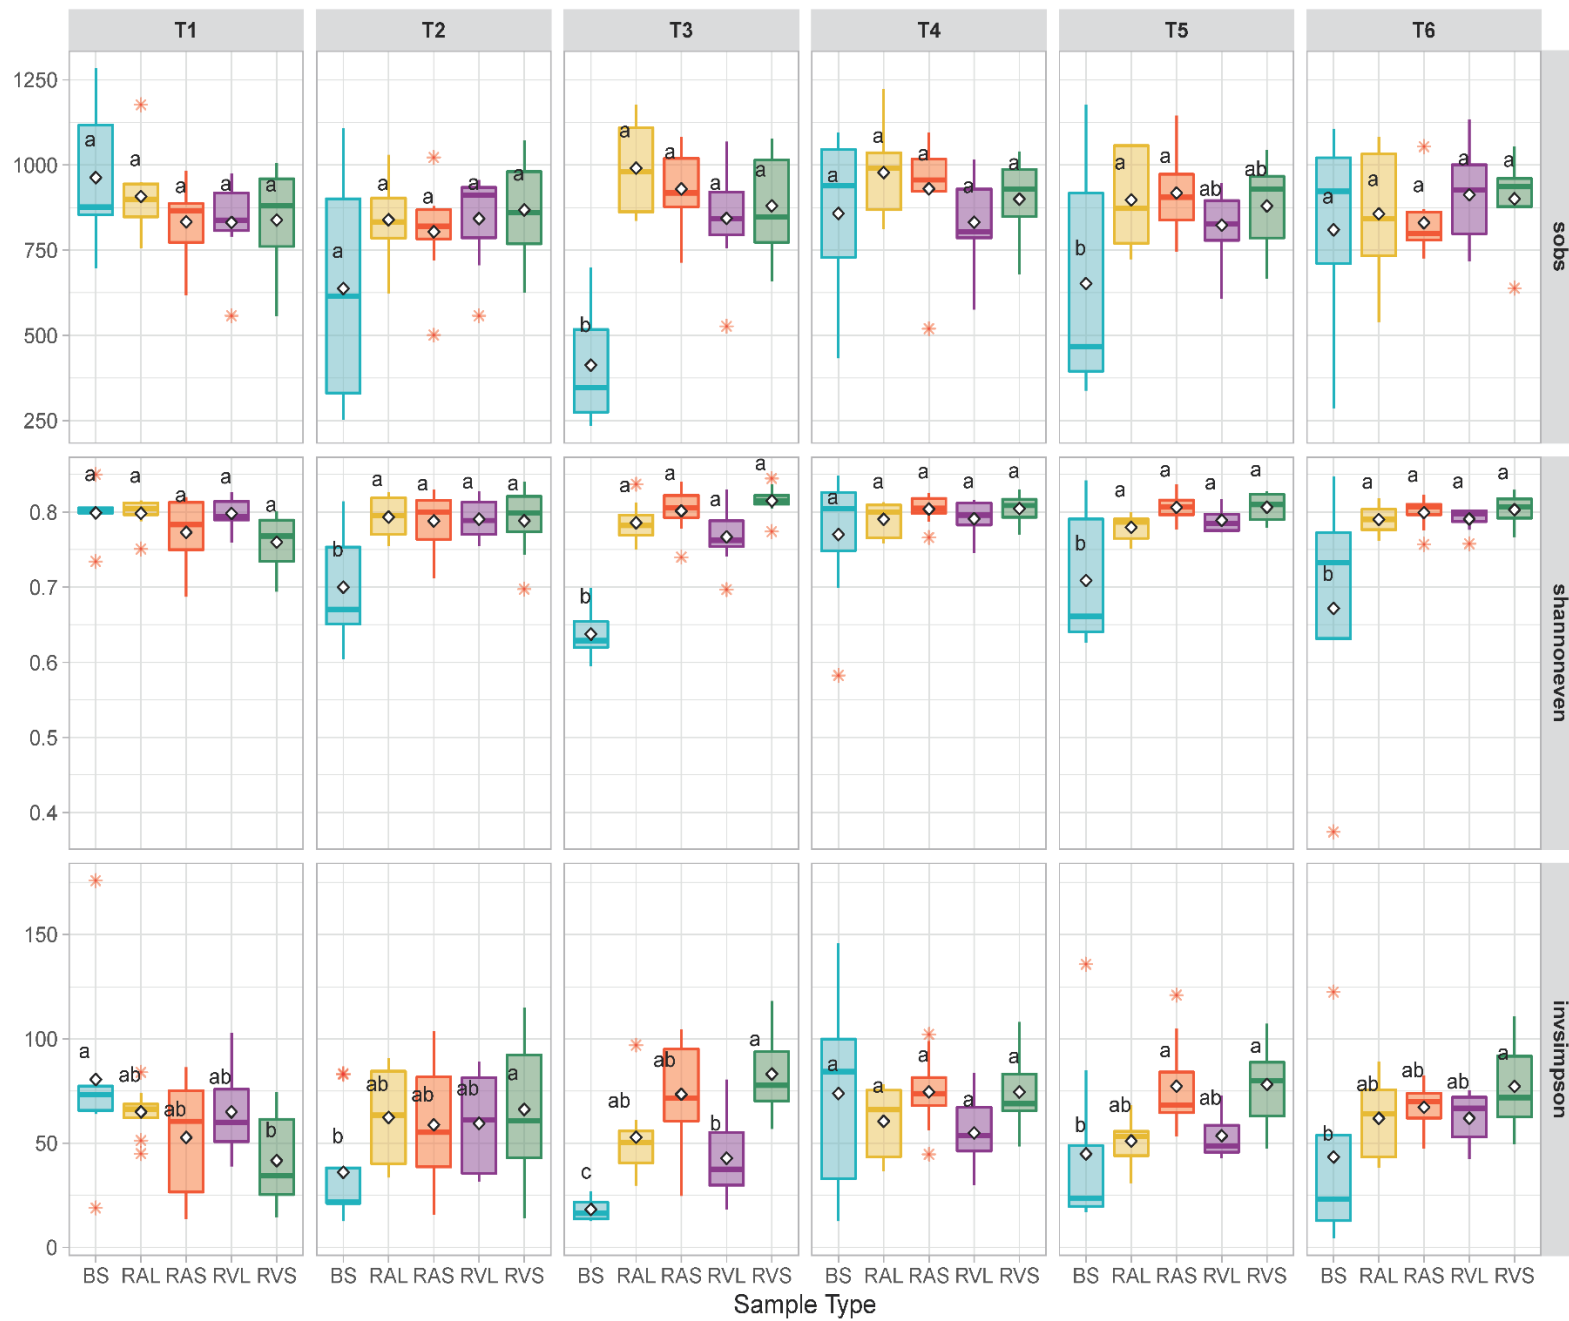

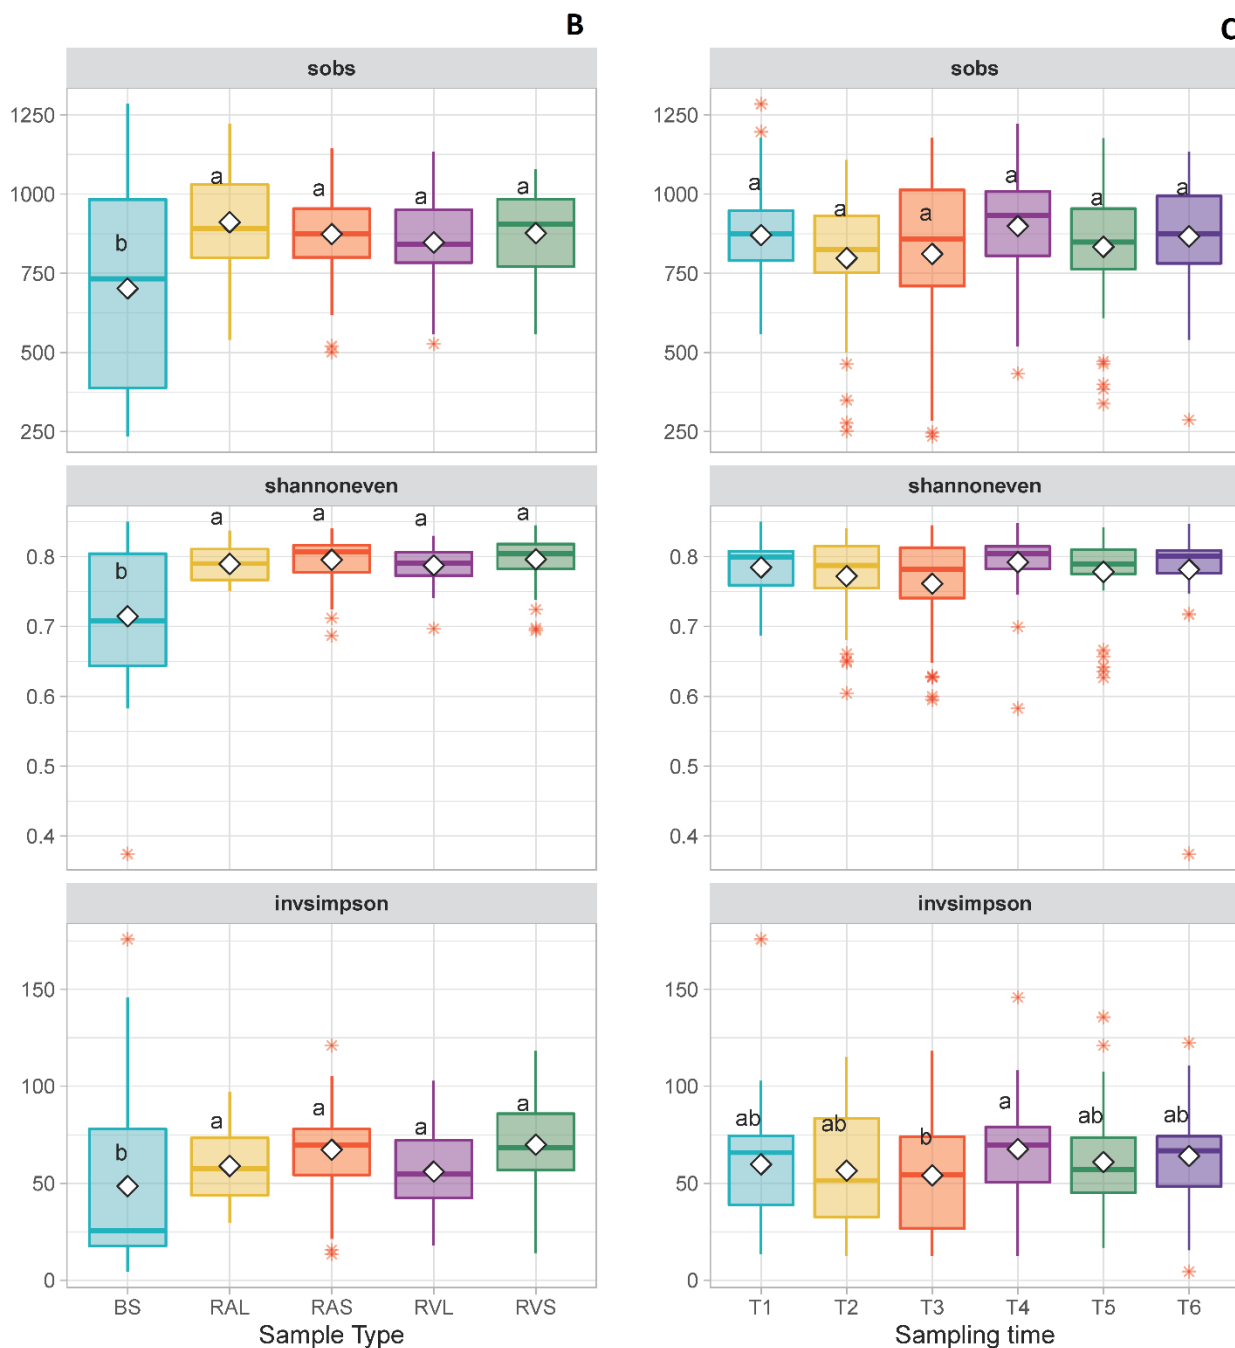

**FIG S3.** Alpha diversity of bacterial communities. (A) Boxplots demonstrate the distribution of alpha diversity indices: Number of observed OTUs (Sobs), Shannon’s evenness (shannoneven) and inverse of Simpson’s diversity (Invsimpson) for each sample type (BS: buccal swab, RAL: rumen anterior liquid, RAS: rumen anterior solid, RVL: rumen ventral liquid and RVS: rumen ventral solid) within each sampling time (T1 to T6). Plots B and C demonstrate the distribution of alpha diversity indices per sample and sampling time, respectively. Boxes represent the interquartile range (IQR) between the first(25<sup>th</sup>) and third quartiles (75<sup>th</sup> percentiles) whereas the horizontal line represents the median and the white diamond represents the mean. Whiskers represent the lowest and highest values within 1.5 times the IQR from the first and third quartiles, respectively and the “\*” represent outliers. LSmeans (back-transformed from the log scale) between groups (sample type within each sampling time, sample type and sampling time) followed by the same letter are not significantly different ( $P > 0.05$ ) by Tukey HSD test.

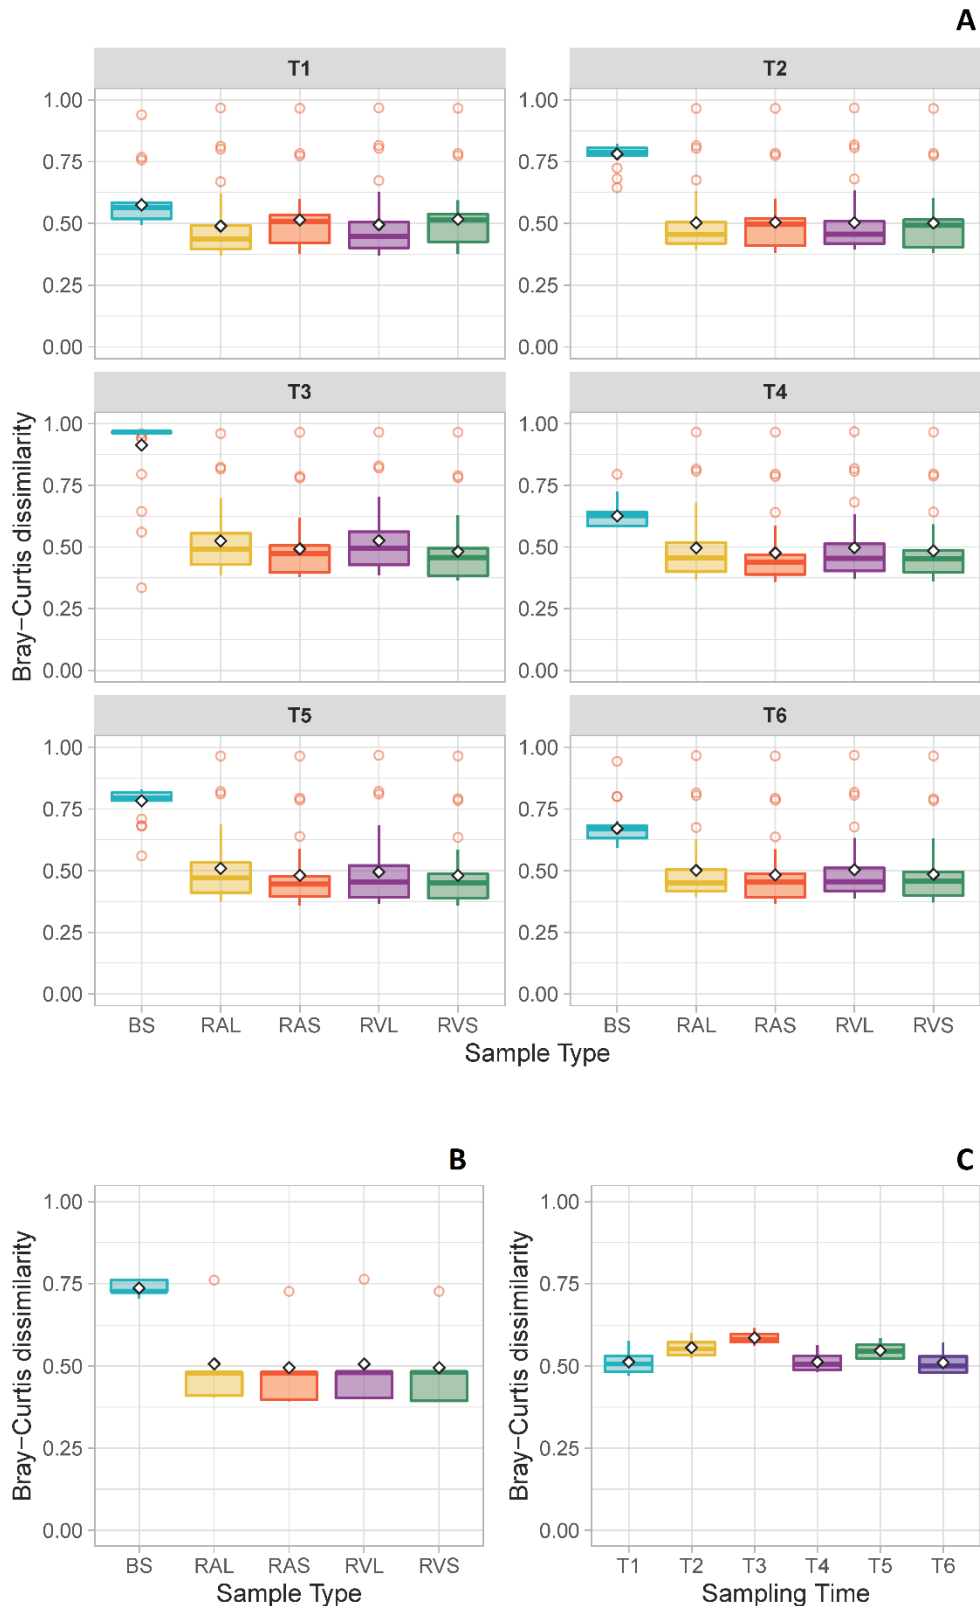

**FIG S4.** Beta diversity of bacterial communities. (A) Boxplots demonstrate the distribution of Bray-Curtis dissimilarity for each sample type (BS: buccal swab, RAL: rumen anterior liquid, RAS: rumen anterior solid, RVL: rumen ventral liquid and RVS: rumen ventral solid) within each sampling time (T1 to T6). Plots B and C demonstrate the distribution of Bray-Curtis dissimilarity per sample and sampling time, respectively. Boxes represent the interquartile range (IQR) between the first(25<sup>th</sup>) and third quartiles (75<sup>th</sup> percentiles) whereas the horizontal line represents the median and the white diamond represents the mean.

Whiskers represent the lowest and highest values within 1.5 times the IQR from the first and third quartiles, respectively and the “o” represent outliers.

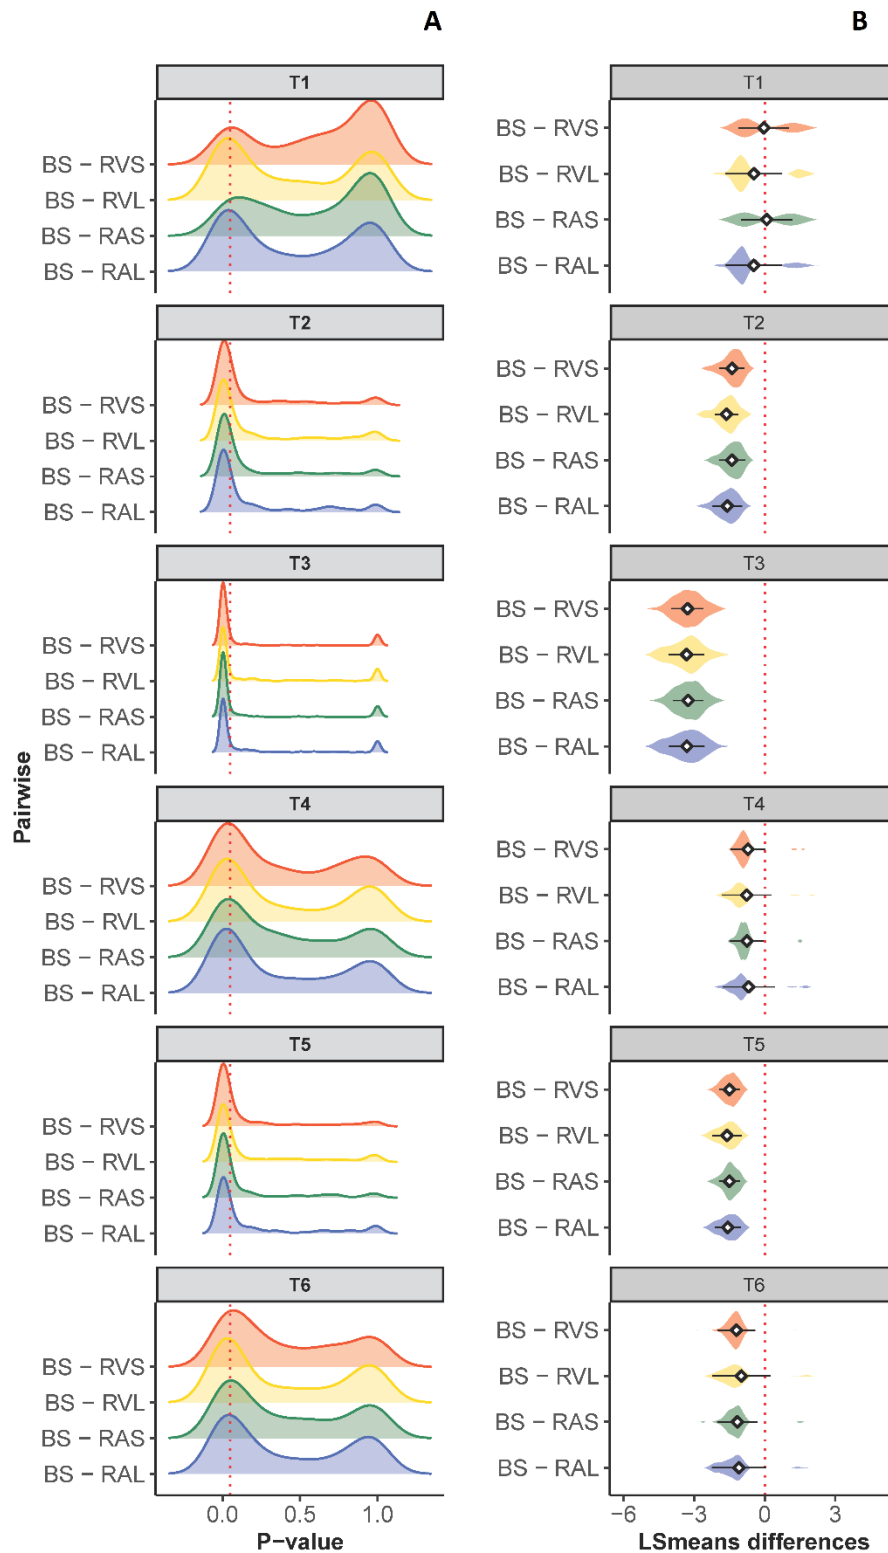

**FIG S5. A)** Ridgeline plots showing the distribution of bacterial OTUs whose abundance varied significantly (red line = P-value  $\leq 0.05$ ) in pairwise comparisons between buccal swab (BS) and all types of rumen samples (RAL, RVL, RAS, and RVS) within each sampling time (T1:T6). **B)** Violin plot showing the Least Squares Means (LSmeans) differences of significant pairwise comparisons (Tukey HSD  $\leq 0.05$ ) between buccal swab and all types of rumen samples within each sampling time. The white diamond and whiskers represent the mean and standard deviation, respectively.

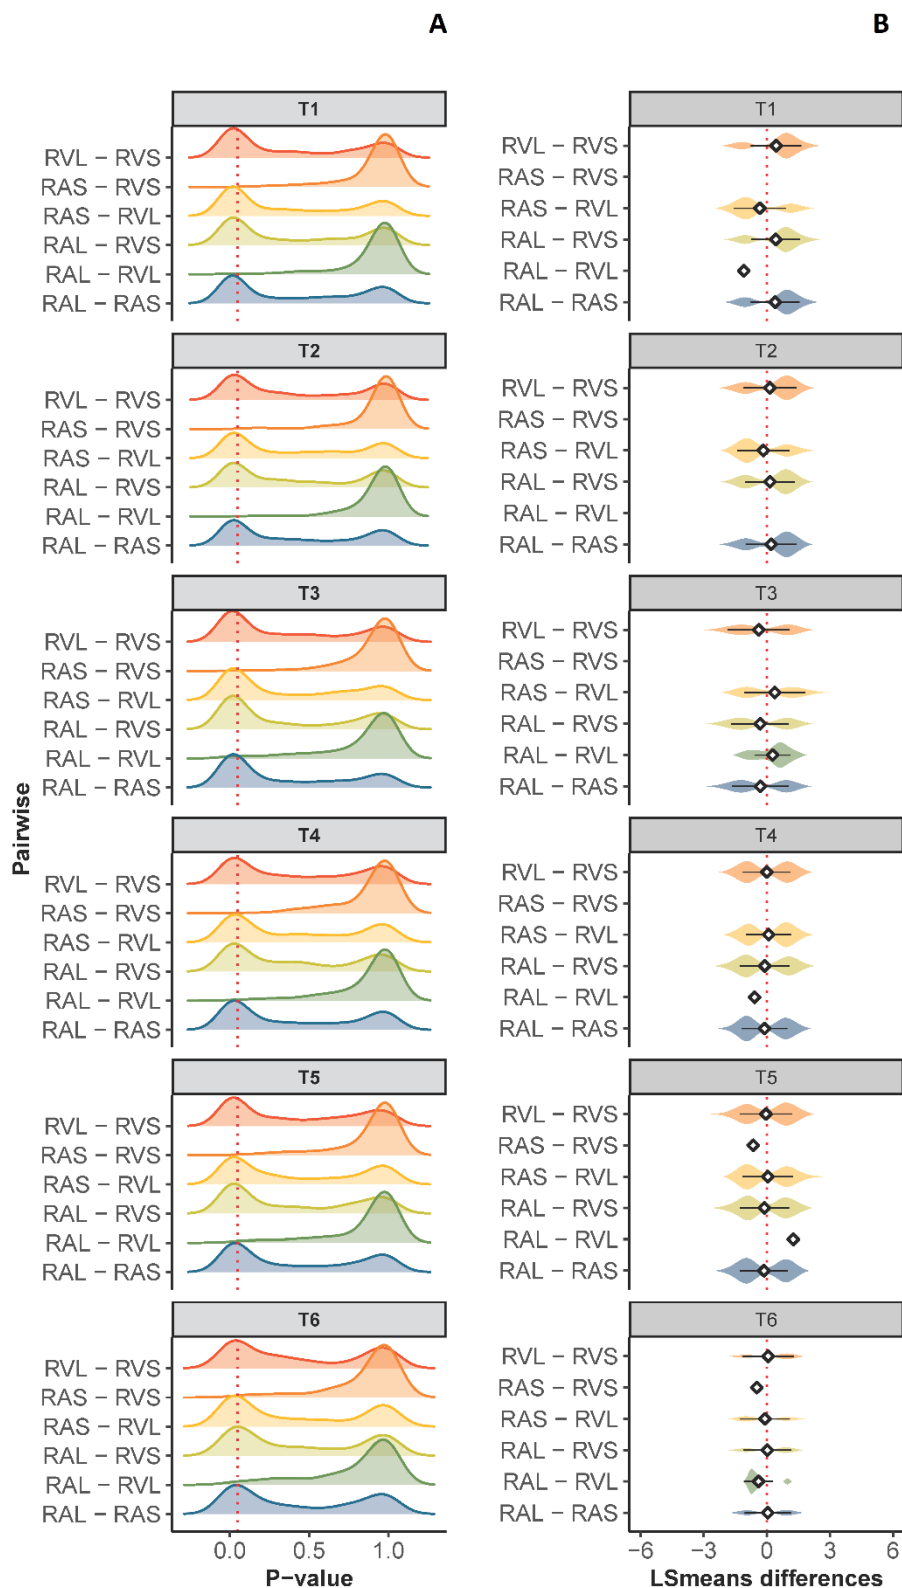

**FIG S6. A)** Ridgeline plot showing the distribution of bacterial OTUs whose abundance varied significantly (red line= $P$ -value $\leq 0.05$ ) in pairwise comparisons between all types of rumen samples (RAL, RVL, RAS, and RVS) within each sampling time (T1:T6). **B)** Violin plot showing Least Square Means (LSMEANS) differences of significant pairwise comparisons (Tukey HSD  $\leq 0.05$ ) between all types of rumen samples within each sampling time.



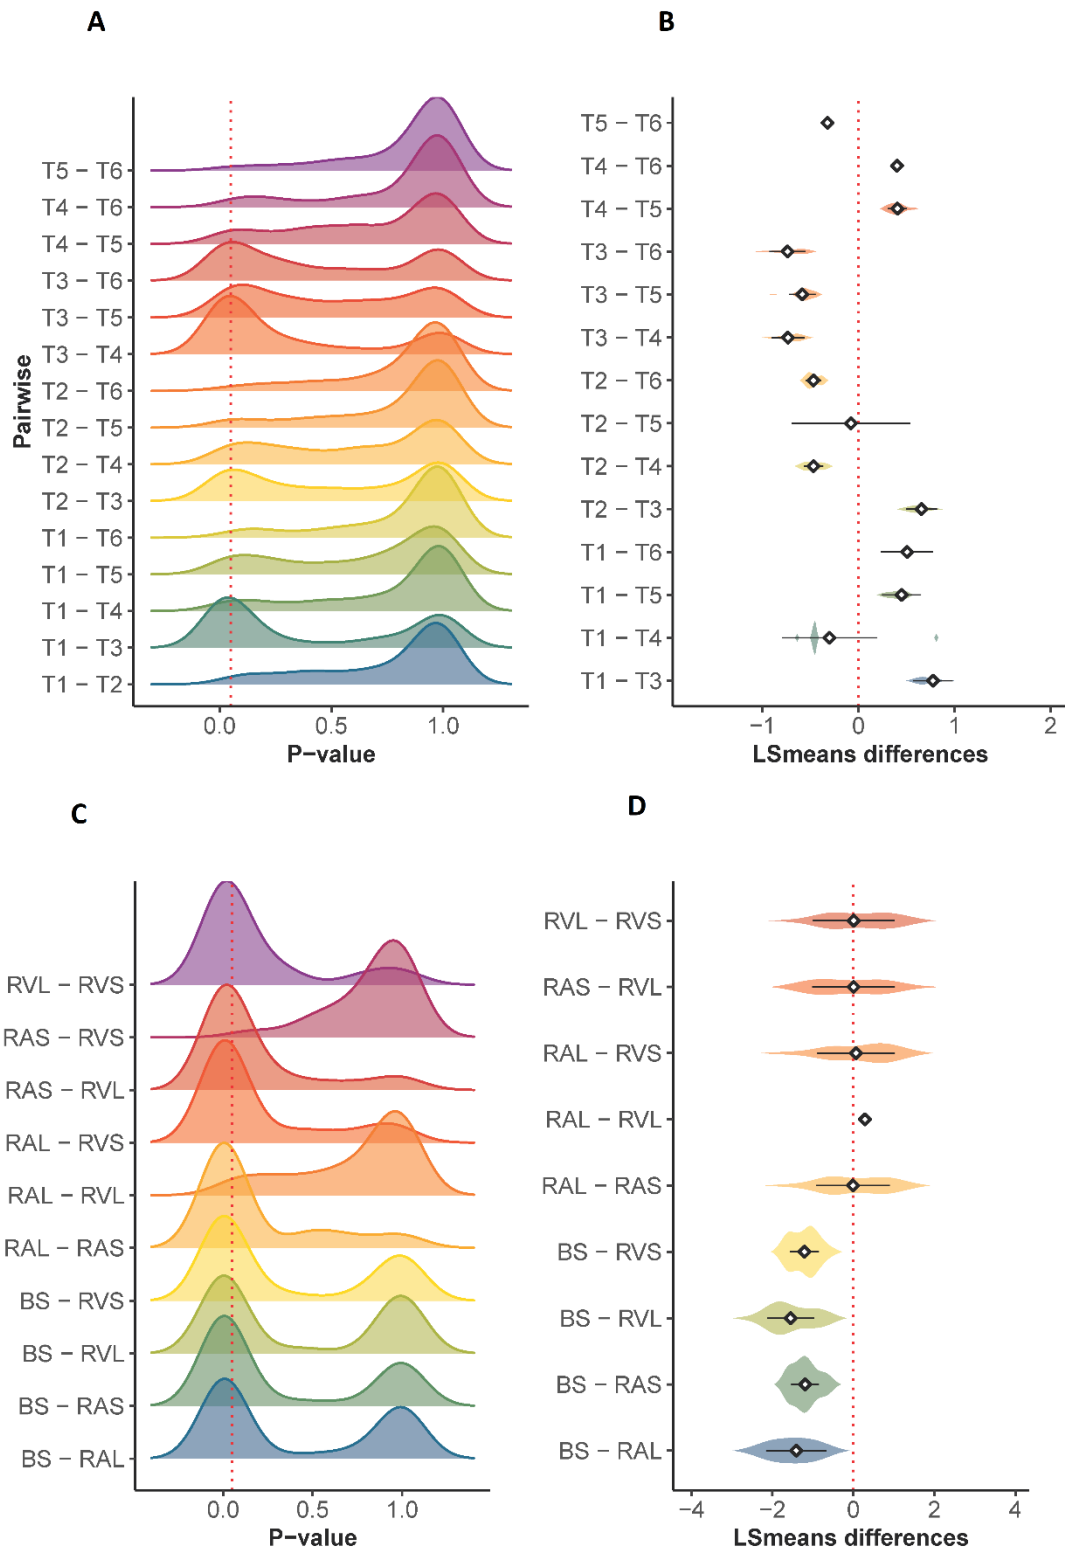

**FIG S7.** Ridgeline plots showing the distribution of bacterial OTUs whose abundance varied significantly (red line=P-value $\leq 0.05$ ) in pairwise comparisons between all the sampling times=T1-T6 (A) and between all the samples types=BS: buccal swab, RAL: rumen anterior liquid, RAS: rumen anterior solid, RVL: rumen ventral liquid and RVS: rumen ventral solid (C). Violin plot showing the Least Square Means (LSmeans) differences of significant pairwise comparisons between all sampling time (B) and all sample types (D) and. Sampling was performed every 2 hours over the course of 10 hours, starting 1 hour prior to morning feeding (T1= $\sim$  9 AM) and ending just prior to evening feeding (T6= $\sim$  7 PM). Pairwise comparison between RAS-RVS were not significant and thus, not shown in the violin plot.

*Validating the use of bovine buccal sampling as a proxy for the rumen microbiota using a time course and random forest classification approach*

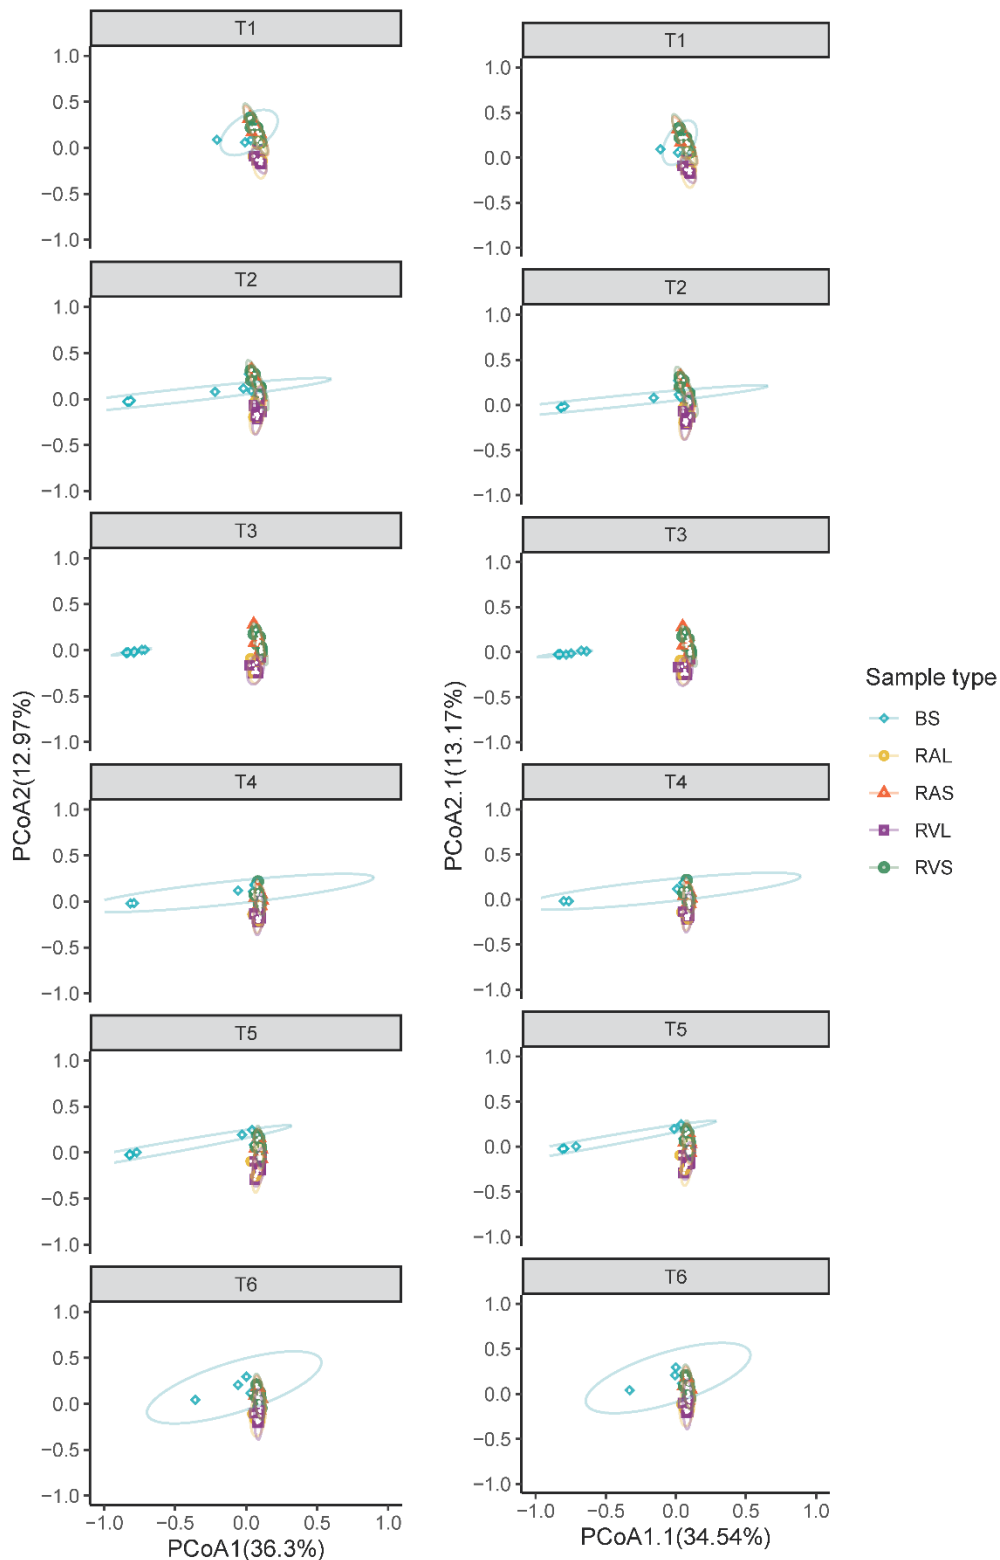

**FIG S8.** Principal coordinate analysis (PCoA) showing Bray-Curtis dissimilarities in the composition of bacterial communities between sample types within each sampling time. **A)** PCoA performed with 8,147 unique OTUs prior to the exclusion of potential oral taxa identified using Random Forest. **B)** PCoA performed with 8,110 unique OTUs remaining after the exclusion of 37 potential oral taxa identified using Random Forest algorithm and that presented Variance Importance (VIMP) score  $\geq 10\%$  (please see Figure 4). Individual points in each plot represent a dairy cow, different colors and shapes represent a sample type (BS: buccal swab, RAL: rumen anterior liquid, RAS: rumen anterior solid, RVL: rumen ventral liquid and RVS: rumen ventral solid), and each facet represents a time point (T1 to T6). Percentages showed along the axes represent, respectively, the proportion of dissimilarities captured by PCoA in 2D coordinate space.

## **#Mothur analysis**

```
make.contigs (file=RumenTimecourse2.txt, processors=10)

summary.seqs (fasta=RumenTimecourse2.trim.contigs.fasta)

screen.seqs (fasta=RumenTimecourse2.trim.contigs.fasta,
group=RumenTimecourse2.contigs.groups, maxambig=0, maxhomop=8,
maxlength=300)

unique.seqs (fasta=RumenTimecourse2.trim.contigs.good.fasta)

count.seqs (name=RumenTimecourse2.trim.contigs.good.names,
group=RumenTimecourse2.contigs.good.groups)

summary.seqs (fasta=RumenTimecourse2.trim.contigs.good.unique.fasta,
count=RumenTimecourse2.trim.contigs.good.count_table)

align.seqs (fasta=RumenTimecourse2.trim.contigs.good.unique.fasta,
reference=/home/GLBRCORG/jhskarlpka/SequencingProjects/MothurFiles/silva.nr_v132.align, flip=T)

summary.seqs (fasta=RumenTimecourse2.trim.contigs.good.unique.align,
count=RumenTimecourse2.trim.contigs.good.count_table)

screen.seqs (fasta=RumenTimecourse2.trim.contigs.good.unique.align,
count=RumenTimecourse2.trim.contigs.good.count_table,
summary=RumenTimecourse2.trim.contigs.good.unique.summary, start=13862,
end=23444)

summary.seqs (fasta=RumenTimecourse2.trim.contigs.good.unique.good.align,
count=RumenTimecourse2.trim.contigs.good.good.count_table)

filter.seqs (fasta=RumenTimecourse2.trim.contigs.good.unique.good.align,
vertical=T, trump=.)

unique.seqs (fasta=RumenTimecourse2.trim.contigs.good.unique.good.filter
.fasta, count=RumenTimecourse2.trim.contigs.good.good.count_table)

pre.cluster (fasta=RumenTimecourse2.trim.contigs.good.unique.good.filter
.unique.fasta,
count=RumenTimecourse2.trim.contigs.good.unique.good.filter.count_table,
diffs=2)

summary.seqs (fasta=RumenTimecourse2.trim.contigs.good.unique.good.filter
.unique.precluster.fasta,
count=RumenTimecourse2.trim.contigs.good.unique.good.filter.unique.precluster
.count_table)

chimera.uchime (fasta=RumenTimecourse2.trim.contigs.good.unique.good.filter
.unique.precluster.fasta,
count=RumenTimecourse2.trim.contigs.good.unique.good.filter.unique.precluster
.count_table, dereplicate=t)

remove.seqs (fasta=RumenTimecourse2.trim.contigs.good.unique.good.filter
.unique.precluster.fasta,
count=RumenTimecourse2.trim.contigs.good.unique.good.filter.unique.precluster
.count_table)
```

*Validating the use of bovine buccal sampling as a proxy for the rumen microbiota using a time course and random forest classification approach*

```
luster.count_table,  
accnos=RumenTimecourse2.trim.contigs.good.unique.good.filter.unique.pre  
cluster.denovo.uchime.accnos)  
  
summary.seqs(fasta=RumenTimecourse2.trim.contigs.good.unique.good.filte  
r.unique.precluster.pick.fasta,  
count=RumenTimecourse2.trim.contigs.good.unique.good.filter.unique.prec  
luster.pick.count_table)  
  
classify.seqs(fasta=RumenTimecourse2.trim.contigs.good.unique.good.filt  
er.unique.precluster.pick.fasta,  
count=RumenTimecourse2.trim.contigs.good.unique.good.filter.unique.prec  
luster.pick.count_table,  
reference=/home/GLBRCORG/jhskarlupka/SequencingProjects/MothurFiles/sil  
va.nr_v132.align,  
taxonomy=/home/GLBRCORG/jhskarlupka/SequencingProjects/MothurFiles/silv  
a.nr_v132.tax, cutoff=80)  
  
remove.lineage(fasta=RumenTimecourse2.trim.contigs.good.unique.good.fil  
ter.unique.precluster.pick.fasta,  
count=RumenTimecourse2.trim.contigs.good.unique.good.filter.unique.prec  
luster.pick.count_table,  
taxonomy=RumenTimecourse2.trim.contigs.good.unique.good.filter.unique.p  
recluster.pick.nr_v132.wang.taxonomy, taxon=unknown;-Archaea;-  
Eukaryota;-Bacteria;Cyanobacteria;Chloroplast;-  
Bacteria;Proteobacteria;Alphaproteobacteria;Rickettsiales;mitochondria;  
)  
  
summary.seqs(fasta=RumenTimecourse2.trim.contigs.good.unique.good.filte  
r.unique.precluster.pick.pick.fasta,  
count=RumenTimecourse2.trim.contigs.good.unique.good.filter.unique.prec  
luster.pick.pick.count_table)  
  
system(cp  
RumenTimecourse2.trim.contigs.good.unique.good.filter.unique.precluster  
.pick.pick.fasta RumenTimecourse2.final.fasta)  
  
system(cp  
RumenTimecourse2.trim.contigs.good.unique.good.filter.unique.precluster  
.pick.pick.count_table RumenTimecourse2.final.count_table)  
  
count.groups(count=RumenTimecourse2.final.count_table)  
  
summary.seqs(fasta=RumenTimecourse2.final.fasta,  
count=RumenTimecourse2.final.count_table)  
  
split.abund(fasta=RumenTimecourse2.final.fasta,  
count=RumenTimecourse2.final.count_table, cutoff=1)  
  
summary.seqs(fasta=RumenTimecourse2.final.abund.fasta,  
count=RumenTimecourse2.final.abund.count_table)  
  
dist.seqs(fasta=RumenTimecourse2.final.abund.fasta)
```

*Validating the use of bovine buccal sampling as a proxy for the rumen microbiota using a time course and random forest classification approach*

```
cluster.split(column=RumenTimecourse2.final.abund.dist,  
count=RumenTimecourse2.final.abund.count_table, method=opti,  
cutoff=0.03)  
  
make.shared(list=RumenTimecourse2.final.abund.opti_mcc.unique_list.list  
count=RumenTimecourse2.final.abund.count_table, label=0.03)  
  
classify.seqs(fasta=RumenTimecourse2.final.abund.fasta,  
count=RumenTimecourse2.final.abund.count_table, template=/home/  
MothurFiles/silva.nr_v132.align,taxonomy=/home/MothurFiles/silva.nr_v13  
2.tax, cutoff=80)  
  
classify.otu(list=RumenTimecourse2.final.abund.opti_mcc.list,  
taxonomy=RumenTimecourse2.final.abund.nr_v132.wang.taxonomy,  
count=RumenTimecourse2.final.abund.count_table, label=0.03, cutoff=80,  
basis=otu, probs=F)  
  
summary.single(shared=RumenTimecourse2.final.abund.opti_mcc.shared,  
label=0.03, calc=nseqs-sobs-coverage)
```

## #R analyses

```
#Summary Sequencing (TABLE S1): Summary of sequencing and alpha
diversity indices)
rm(list=ls())
library(data.table)
library(reshape)
library(plyr)

#load
coverage<- read.table(file="RumenTimecourse_PreNorm.groups.summary",
header=T)
alpha<- read.table(file="RumenTimecourse_Norm.groups.summary",
header=T)
meta_data=read.table(file="meta_data_Joe.txt", header=TRUE, sep = "\t")

#merge/melt
merge=merge(meta_data, alpha, by="group")
subset=subset(merge, select= c("group", "cow", "class", "time",
"nseqs", "coverage",
"sobs", "ace", "shannoneven", "simpson", "bergerparker",
"invsimpson"))

melt=melt(subset, id.vars=c("cow", "group", "class", "time"))

#summary by time and sample type
se <- function(x) {sd(x)/sqrt(length(x))}
summary1=cast(melt, class+time~variable, value='value', fun.aggregate =
c(length, sum, mean, sd))
summary1 =data.frame(lapply(summary1, function(y) if(is.numeric(y))
formatC (y, 2, format="f") else y))

#export
library(openxlsx)
write.xlsx(summary1,
file="code/summary_sequencing_alpha_diversity.xlsx")
```

## **#Anova Alpha diversity**

```
rm(list=ls())
library(MASS)
library(multcomp)
library(nlme)
library(lsmmeans)
library(ggplot2)

library(data.table)
#library(reshape)
#library(plyr)

#load
alpha<- read.table(file="RumenTimecourse_Norm.groups.summary",
header=T)
meta_data=read.table(file="meta_data_Joe.txt", header=TRUE, sep = "\t")

#merge/melt
merge=merge(meta_data, alpha, by="group")
subset=subset(merge, select= c("group", "cow", "class", "time",
"sobs", "ace", "shannoneven", "simpson", "bergerparker",
"invsimpson"))

dat=subset

resp_alpha <- names(dat)[!(names(dat) %in% c("cow", "time", "class",
"group"))]

dat$cow=as.factor(dat$cow)
dat$group=as.factor(dat$group)
dat$time=as.factor(dat$time)
dat$class=as.factor(dat$class)

set.seed(12)
analyse<- lsm_dtime <- lsm_dclass <- lsm_dint <- cld_dtime <-cld_dclass <-
cld_dint<- contr_dtime <- contr_dclass <- contr_dint <-NULL

for(i in resp_alpha){
bac<-data.frame(dat[2:4],y=dat[,i])
fit<-glmmPQL(y~time*class, random=~1|cow/time, family=Gamma(link = log),
correlation=corAR1(), data = bac)
anova=anova.lme(fit, type="sequential", adjustSigma=FALSE)
analyse<-rbind(analyse,data.frame("alpha_index"=i,anova))

lsm_time <- lsmmeans(fit, ~ time, type="response")
lsm_dtime<-rbind(lsm_dtime,data.frame("alpha_index"=i, lsm_time))
cld_time <- cld(lsm_time, Letters=letters, reverse=T, alpha=0.05,
type="response", adjust="tukey")
cld_dtime<- rbind(cld_dtime,data.frame("alpha_index"=i, cld_time))
```

*Validating the use of bovine buccal sampling as a proxy for the rumen microbiota using a time course and random forest classification approach*

```
lsm_class <- lsmeans(fit, ~ class, type="response")
lsm_dclass<-rbind(lsm_dclass,data.frame("alpha_index"=i, lsm_class))
cld_class <- cld(lsm_class, Letters=letters, reverse=T, alpha=0.05,
type="response", adjust="tukey")
cld_dclass<- rbind(cld_dclass,data.frame("alpha_index"=i, cld_class))

lsm_int <- lsmeans(fit, ~ class|time, type="response")
lsm_dint<-rbind(lsm_dint,data.frame("alpha_index"=i, lsm_int))
cld_int <- cld(lsm_int, Letters=letters, reverse=T, alpha=0.05,
type="response", adjust="tukey")
cld_dint<- rbind(cld_dint,data.frame("alpha_index"=i, cld_int))
}

#Organizing to export
analyse$factor=rownames(analyse)
rownames(analyse)=NULL
analyse=analyse[c(5,6,1:4)]

library(openxlsx)
results <- list("Anova_Gamma_distribution" = analyse, "Tukey_letters_time" =
cld_dtime, "Tukey_letters_class"= cld_dclass, "Tukey_letters_int"= cld_dint)

write.xlsx(results, file = "code/Anova_Alpha_Results.xlsx")

#plot
library(ggplot2)
library(data.table)
#int
data=melt(subset, id.vars=c("cow", "group", "class", "time"))
colnames(data)[5]=c("alpha_index")
data_int=merge(data, cld_dint, by=c("alpha_index","class","time"))
selected=c("sobs","shannoneven","invsimpson")
data_int= data_int[data_int$alpha_index%in%selected,]
data_int$alpha_index =droplevels(data_int$alpha_index)

pdf("alpha_boxplot_int.pdf", useDingbats=FALSE, onefile=T, paper='A4r',
width=12, height=7)
ggplot(data_int, aes(x = class, y = value)) +
geom_boxplot(aes(fill=class, colour=class), alpha=0.4,outlier.colour =
"red", outlier.shape = 8) + facet_grid(alpha_index~time,
scales="free_y")+ scale_fill_manual(values = c("#00AFBB", "#E7B800",
"#FC4E07", "magenta4", "seagreen")) +scale_colour_manual(values=
c("#00AFBB", "#E7B800", "#FC4E07", "magenta4", "seagreen"))+
theme_light()+theme(legend.position="none") + theme(strip.background =
element_rect(fill="grey85"))+ theme(strip.text.x = element_text(colour
= "black", face = "bold"), strip.text.y = element_text(colour =
"black", face = "bold")) +labs(x = "Sample Type",y = "",color = "")
```



*Validating the use of bovine buccal sampling as a proxy for the rumen microbiota using a time course and random forest classification approach*

```
+geom_text(data=data_int, aes(x=class, y=response, label=.group), vjust=-2,
hjust=1, check_overlap = T, show.legend = FALSE, size=3)

dev.off()

#class
data_class=merge(data, cld_dclass, by=c("alpha_index","class"))
selected=c("sobs","shannoneven","invsimpson")
data_class= data_class[data_class$alpha_index%in%selected,]
data_class$alpha_index =droplevels(data_class$alpha_index)

pdf("alpha_boxplot_class.pdf", useDingbats=FALSE, onefile=T,
paper='A4r', width=12, height=3)
ggplot(data_class, aes(x = class, y = value)) +
geom_boxplot(aes(fill=class, colour=class), alpha=0.4,outlier.colour =
"red", outlier.shape = 8) + facet_wrap(~alpha_index, scales="free")+
scale_fill_manual(values = c("#00AFBB", "#E7B800", "#FC4E07",
"magenta4", "seagreen")) +scale_colour_manual(values= c("#00AFBB",
"#E7B800", "#FC4E07", "magenta4", "seagreen"))+
theme_light()+theme(legend.position="none") + theme(strip.background =
element_rect(fill="grey85"))+ theme(strip.text.x = element_text(colour =
"black", face = "bold"), strip.text.y = element_text(colour =
"black", face = "bold")) +labs(x = "Sample Type",y = "",color = "")
+geom_text(data=data_class, aes(x=class, y=response, label=.group), vjust=-
2.4, hjust=1, check_overlap = T, show.legend = FALSE, size=3.5)

dev.off()

#time
data_time=merge(data, cld_dtime, by=c("alpha_index","time"))
selected=c("sobs","shannoneven")
data_time1= data_time[data_time$alpha_index%in%selected,]
data_time1$alpha_index =droplevels(data_time1$alpha_index)

selected=c("invsimpson")
data_time2= data_time[data_time$alpha_index%in%selected,]
data_time2$alpha_index =droplevels(data_time2$alpha_index)
data_time2$.group=c("")

data_time_final=rbind(data_time1, data_time2)

pdf("alpha_boxplot_time.pdf", useDingbats=FALSE, onefile=T,
paper='A4r', width=12, height=3)
ggplot(data_time_final, aes(x = time, y = value)) +
geom_boxplot(aes(fill=time, colour=time), alpha=0.4,outlier.colour =
"red", outlier.shape = 8) + facet_wrap(~alpha_index, scales="free")+
scale_fill_manual(values = c("#00AFBB", "#E7B800", "#FC4E07",
"magenta4", "seagreen","purple4")) +scale_colour_manual(values=
c("#00AFBB", "#E7B800", "#FC4E07", "magenta4", "seagreen","purple4"))+
theme_light()+theme(legend.position="none") + theme(strip.background =
```

*Validating the use of bovine buccal sampling as a proxy for the rumen microbiota using a time course and random forest classification approach*

```
element_rect(fill="grey85"))+ theme(strip.text.x = element_text(colour = "black", face = "bold"), strip.text.y = element_text(colour = "black", face = "bold")) +labs(x = "Sample Type", y = "", color = "") +geom_text(data=data_time_final, aes(x=time, y=response, label=.group), vjust=-2.7, hjust=1, check_overlap = T, show.legend = FALSE, size=3.5)
```

```
dev.off()
```

**#Rarefaction (FIG S1):** assessing the depth of coverage for each sample grouped according to sample type and sampling time.

```
rm(list=ls())
library(tidyverse)
library(RColorBrewer)
library(data.table)
library(ggforce)

#read
rare=read.table(file="RumenTimecourse_Norm.groups.rarefaction",
header=TRUE)
meta_data=read.table(file="meta_data_Joe.txt", header=TRUE, sep = "\t")

#subset
rownames(rare)=rare$numsampled
subset=rare %>% select(contains("X0.03."))
colnames(subset)=gsub("X0.03.", "", colnames(subset))
subset$numsampled=rownames(subset)
subset$numsampled=as.numeric(subset$numsampled)
rownames(subset)=NULL

#merge/melt
melt=melt(subset, id.vars="numsampled")
colnames(melt)=c("numsampled", "group", "sobs")
melt=merge(meta_data, melt, by="group")
melt <- na.omit(melt)
melt$class=as.factor(melt$class)
melt$time=as.factor(melt$time)

#Plot
color= colorRampPalette(
c("#00AFBB", "#E7B800", "#FC4E07", "purple", "seagreen")) (5)
pdf("code/rarefaction_by_class_and_time.pdf", useDingbats=FALSE,
onfile=T, paper='A4', width=9, height=11)
ggplot(melt, aes(x = numsampled, y = sobs))+
  geom_line(aes(x = numsampled, y = sobs, group = group, color =
class), size=1, linetype=1, alpha=0.4)+
  geom_text(data = melt %>%
            group_by(group, class, time) %>%
```

*Validating the use of bovine buccal sampling as a proxy for the rumen microbiota using a time course and random forest classification approach*

```
summarise(max_OTU = max(sobs),
max_raw = max(numsampled)),
aes(x = max_raw, y = max_OTU, label = group),
check_overlap = T, hjust = 0, size=1)+ theme_bw()+facet_wrap (~ time,
ncol=2) + labs(x = "Number of Sequences",y = "Number of OTUs",colour =
"Sample type") + scale_colour_manual(values=color) +
theme_classic()+theme(legend.position="right", strip.background =
element_rect(fill="grey85"))
dev.off()
```

**#Beta diversity-PCoA (Fig. 1):** visualizing differences in the Bray-Curtis compositional dissimilarity of bacterial communities according to sample type and sampling time

```
rm(list=ls())
library(ape)
library(vegan)
library(EcolUtils)
library(ggplot2)
library(RColorBrewer)

#read OTU table and meta data
otu=read.table(file="RumenTimecourse_Norm.shared_clean.txt",
header=TRUE)
meta_data=read.table(file="meta_data_Joe.txt", header=TRUE, sep = "\t")
rownames(otu)=otu$Group; otu$Group=otu$label=otu$numOtus=NULL
meta_data= meta_data[match(rownames(otu),rownames(meta_data)),]

#PCoA
dist <- vegdist(otu, "bray")
pcoa <- pcoa(dist, correction="none")
vector=as.data.frame(pcoa$vectors[,1:2])
PCOA=data.frame(group=rownames(vector), x=vector
[,1],y=vector[,2],class=as.factor(meta_data[,3]),
time=as.factor(meta_data[,4]))

PCoA1_eig=round(100*(pcoa$values$Relative_eig[1]), 2)
PCoA2_eig=round(100*(pcoa$values$Relative_eig[2]), 2)

x_lab=paste("PCoA1", "(", PCoA1_eig, "%",")",sep="")
y_lab=paste("PCoA2", "(", PCoA2_eig, "%",")",sep="")

#Plot
pdf(file="code/PCOA_class_time.pdf", onefile=T, paper='A4', width=8.27,
height=11.69)
ggplot(PCOA, aes(x = x, y = y, color = class, fill=class)) +
geom_point(aes(color=factor(class), shape=factor(class),
size=factor(class)), alpha=0.6) + geom_point(colour= c("white"),
size=0.015, stat="identity") + scale_color_manual(values=c("#00AFBB",
```

*Validating the use of bovine buccal sampling as a proxy for the rumen microbiota using a time course and random forest classification approach*

```
"#E7B800", "#FC4E07", "#E7B800", "#FC4E07")) +
scale_size_manual(values=c(3.5,2.5,2.5,3,3))
+scale_shape_manual(values=c(18,16,16, 17,17),guide="legend")
+theme(plot.background=element_rect(fill="white"),plot.margin =
unit(c(0,0,0,0), "cm"))+ theme(legend.position="right") + labs(x=
x_lab ,y = y_lab, colour = "Sample type", shape="Sample type",
fill="Sample type") + scale_y_continuous(limits = c(-
0.9,0.9),breaks=seq(-0.9,0.9, by=0.5))+scale_x_continuous(limits = c(-
0.9,0.9), breaks=seq(-0.9, 0.9, by=0.5)) +facet_wrap( ~ time, nrow =3)
+ guides(colour = "legend", shape = "legend")+ guides(color =
guide_legend("Sample type"), shape = guide_legend("Sample type"), size=
guide_legend("Sample type"))+theme_classic()+ theme(strip.background =
element_rect(fill="grey85")) + coord_fixed()+ stat_ellipse(type =
"norm", linetype ="dashed", alpha=0.5, size=0.25)
dev.off()
```

**#continuing Beta diversity-Permanova (TABLE S3):** Assessing differences in the Bray-Curtis compositional dissimilarity of bacterial communities in response to sampling time, sample type and interaction of these two factors

```
meta_data$cow=as.factor(meta_data$cow)
meta_data$time=as.factor(meta_data$time)
meta_data$class=as.factor(meta_data$class)
```

```
permanova=adonis2(dist ~ meta_data$time*meta_data$class,
permutations=1000, method="bray", by = "terms")
saveRDS(permanova, file="code/permanova_model")
```

```
ad=adonis.pair(dist, meta_data$time*meta_data$class, nper = 1000,
corr.method = "BH")
```

```
library(splitstackshape)
ad=cSplit(ad, "combination", "<->")
ad=as.data.frame(ad)
ad$combination_2=NULL
```

```
library(dplyr)
pairwise=rbind(filter(ad, grepl('T1',combination_1) &
grepl('T1',combination_3)), filter(ad, grepl('T2',combination_1) &
grepl('T2',combination_3)), filter(ad, grepl('T3',combination_1) &
grepl('T3',combination_3)), filter(ad, grepl('T4',combination_1) &
grepl('T4',combination_3)), filter(ad, grepl('T5',combination_1) &
grepl('T5',combination_3)), filter(ad, grepl('T6',combination_1) &
grepl('T6',combination_3)))
```

```
#export
library(openxlsx)
write.xlsx(pairwise, file = "code/permanova_pairwise.xlsx")
```

*Validating the use of bovine buccal sampling as a proxy for the rumen microbiota using a time course and random forest classification approach*

```
# Random Forest classifier (Excel TABLE S4, S5, S6): 3 merged classes
rm(list=ls())
library(DMwR)
library(data.table)
library(caret)

#Read
abund=read.table(file="abund_filtered_0.05_0_norm.txt", header=TRUE,
sep = "\t")
meta_data=read.table(file="meta_data_Joe.txt", header=TRUE, sep = "\t")
meta_data= meta_data[match(rownames(abund),rownames(meta_data)),]

#Relevel
levels(meta$class) <- c("BS", "RL", "RS", "RL", "RS")
table(meta_data$class)

#Add class to dataset
abund$class=meta_data[rownames(abund), "class"]

# Split into Train and Validation sets (70 : 30 random)
intrain <- createDataPartition(abund$class,p=0.7, list=F)
train_data <- abund[intrain,]
test_data <- abund[-intrain,]
train_class <- as.factor(train_data$class)
test_class <- as.factor(test_data$class)
train_data <- train_data[,-which(colnames(train_data)=="class")]
test_data <- test_data[,-which(colnames(test_data)=="class")]

set.seed(100)

# replace (sampling="down","up","smote"), run a save model and
confusion matrix in testing set

#Model default
model_default <- caret::train(train_data, train_class, method = "rf",
trControl = trainControl(method = "repeatedcv", repeats = 3, number =
10, verboseIter = T, sampling = "none", classProbs = TRUE,
savePredictions = TRUE))
prob_default <- data.frame(observed = test_class,
predict(model_default, test_data, type = "prob"))
prob_default$predicted= predict(model_default,test_data)
prob_default$match <- prob_default$observed ==prob_default$predicted
cm_default <- confusionMatrix(prob_default$predicted, test_class)
saveRDS(model_default, "model_default_final.txt")
saveRDS(cm_default, "cm_default_final.txt")

#Visualize overall performance (Kappa and Accuracy)
model_smote =readRDS("model_smote_final.txt")
model_up=readRDS("model_up_final.txt")
model_default=readRDS("model_default_final.txt")
model_down=readRDS("model_down_final.txt")
```

*Validating the use of bovine buccal sampling as a proxy for the rumen microbiota using a time course and random forest classification approach*

```
models <- list(default = model_default, up = model_up, down =
model_down, smote = model_smote)
resampling <- resamples(models)
bwplot(resampling)
dev.off()

# Visualize model performance by sample type
#replace default per smote, down and up
default<- data.frame(Sensitivity = cm_default$byClass[,"Sensitivity"],
                    Specificity = cm_default$byClass[,"Specificity"],
                    Precision = cm_default$byClass[,"Precision"],
                    Recall = cm_default$byClass[,"Recall"],
                    F1 = cm_default$byClass[,"Balanced Accuracy"])
default$model=c("default")

plot=rbind(default, smote, up, down)
plot$class=rownames(plot);rownames(plot)=NULL

library(dplyr)
library(ggplot2)
library(tidyr)

plot1=plot %>% gather(x, y, Sensitivity:Balanced Accuracy)
plot1$class=as.factor(plot1$class)
plot1$model=as.factor(plot1$model)

library(openxlsx)
write.xlsx(plot1, file = "code/Random_Forest_results.xlsx")

#VIMP plot
library (dplyr)
imp=as.data.frame(varImp(model_smote)$importance, varImp.train=FALSE)
imp$OTU = as.factor(rownames(imp));rownames(imp)=NULL
arranje <- arrange(imp, desc(Overall))
top20 <- arrange [1:24,]#select OTUs that display importance>=50%

pdf(file="vimp_plot.pdf", onefile=T, paper='A4r', width=11, height=5)
color2= colorRampPalette( c("#00AFBB", "#E7B800", "#FC4E07"))(24)

ggplot(df)+ geom_linerange(aes(x= reorder(taxon, Overall), ymin=0,
ymax=Overall ,colour=taxon), size=1.0, alpha=0.5)+
  geom_point(aes(x =taxa, y = Overall, colour =taxa), size=3,
alpha=0.5, shape=21, fill="white", stroke=1.5) +
  theme_light()+scale_colour_manual(values=color2) + labs(x = "Taxa",
y="% MeanDecreaseGini")+ theme(strip.background =
element_rect(fill="grey85"))+coord_flip()+
  theme(legend.position="none") +theme(text = element_text(size=12))
```

```
dev.off()
```

```
# ANOVA (Excel TABLE S7) : Assessing differences in the relative abundance of bacterial OTUs using General Linear Mixed Model estimated via Penalized Quasi-Likelihood. Differences in alpha diversity were assessed using the same model under Gamma distribution (TABLE S2) instead Poisson. In both analyses, the covariance structure used was corAR1: autocorrelation structure of order 1 that requires equally spaced time intervals.
```

```
rm(list=ls())  
library(MASS)  
library(multcomp)  
library(nlme)  
library(lsmeans)  
library(ggplot2)
```

#### **#read**

```
cont=read.table(file="otus_filtered_0.05_0.txt", header=TRUE, sep = "\t")  
meta=read.table(file="meta_data_Joe.txt", header=TRUE, sep = "\t")  
meta=meta[match(rownames(cont), rownames(meta)),]  
taxa= read.table(file="taxa_fixed_novo.txt", header=TRUE, sep = "\t")  
taxa=subset(taxa, select=c("OTU", "novo"))
```

#### **#offset variable**

```
ultimo=length(cont)  
tot_bac <- apply(cont[,1:length(cont)],1,sum)
```

#### **#Sub setting OTUs present in at least 80% of all samples**

```
shared=colSums(cont!= 0)  
shared_otus= names(shared[shared>= 185]) samples  
cont<- cont[,shared_otus];  
dim(cont)
```

#### **#Anova with post hoc (Tukey correction)**

```
dat=cbind(meta, cont)  
dat$cow=as.factor(dat$cow)  
dat$class=as.factor(dat$class)  
dat$time=as.factor(dat$time)
```

```
set.seed(3)
```

```
resp_bac_cont <- names(dat)[!(names(dat) %in% c("cow", "time", "class", "group"))]
```

```
analise<- lsm_dtime <- lsm_dclass <- lsm_dint <- cld_dtime <-cld_dclass <-  
cld_dint<- contr_dtime <- contr_dclass <- contr_dint <-NULL
```

```
for(i in resp_bac_cont){  
bac<-data.frame(dat[2:4],y=dat[,i])  
fit<-glmmPQL (y~time*class+offset(log(tot_bac)), random=~1|cow/time,  
family=poisson(link = log), correlation=corAR1(), data = bac)  
anova=anova.lme(fit, type="sequential", adjustSigma=FALSE)  
analise<-rbind(analise,data.frame("OTU"=i,anova))
```

*Validating the use of bovine buccal sampling as a proxy for the rumen microbiota using a time course and random forest classification approach*

```
lsm_time <- lsmeans(fit, ~ time, adjust="tukey")
lsm_dtime<-rbind(lsm_dtime,data.frame("OTU"=i, lsm_time))
contr_time=contrast(lsm_time, alpha=0.05, method="pairwise")
contr_dtime<-rbind(contr_dtime,data.frame("OTU"=i, contr_time))
cld_time <- cld(lsm_time, Letters=letters, reverse=T, alpha=0.05)
cld_dtime<- rbind(cld_dtime,data.frame("OTU"=i, cld_time))

lsm_class <- lsmeans(fit, ~ class, adjust="tukey")
lsm_dclass<-rbind(lsm_dclass,data.frame("OTU"=i, lsm_class))
contr_class=contrast(lsm_class, alpha=0.05, method="pairwise")
contr_dclass<-rbind(contr_dclass,data.frame("OTU"=i, contr_class))
cld_class <- cld(lsm_class, Letters=letters, reverse=T, alpha=0.05)
cld_dclass<- rbind(cld_dclass,data.frame("OTU"=i, cld_class))

lsm_int <- lsmeans(fit, ~ class|time, adjust="tukey")
lsm_dint<-rbind(lsm_dint,data.frame("OTU"=i, lsm_int))
contr_int=contrast(lsm_int, alpha=0.05, method="pairwise")
contr_dint<-rbind(contr_dint,data.frame("OTU"=i, contr_int))
cld_int <- cld(lsm_int, Letters=letters, reverse=T, alpha=0.05)
cld_dint<- rbind(cld_dint,data.frame("OTU"=i, cld_int))
}
```

#### **#Adjusting p-values**

```
analise$factor=c("(Intercept)","class","time","class:time")
rownames(analise)=NULL
analise=subset(analise, select=c(1, 6, 2:5))
analise=subset(analise, factor!="(Intercept)")
analise$p.adjust= p.adjust(analise$p.value, "fdr")
analise=subset(analise, p.adjust<=0.05)
```

#### **#Sub setting final results**

```
anova=merge(taxa, analise, by="OTU")
contr_dint= merge(taxa, contr_dint, by="OTU")
contr_dtime= merge(taxa, contr_dtime, by="OTU")
contr_dclass= merge(taxa, contr_dclass, by="OTU")

anova_time=subset(anova, factor=="time")
anova_class=subset(anova, factor=="class")
anova_int=subset(anova, factor=="class:time")

names_int_time=dput(as.character(intersect(unique(anova_int$OTU),
unique(anova_time$OTU))))

names_int_class=dput(as.character(intersect(unique(anova_int$OTU),
unique(anova_class$OTU))))
```

#varied independently of interaction

```
anova_class1= anova_class[!anova_class$OTU%in%names_int_class,]
anova_time1 = anova_time[!anova_time$OTU%in%names_int_time,]
```



*Validating the use of bovine buccal sampling as a proxy for the rumen microbiota using a time course and random forest classification approach*

```
names_anova_int=dput(as.character(anova_int$OTU))
names_anova_time=dput(as.character(anova_time1$OTU))
names_anova_class=dput(as.character(anova_class1$OTU))

cld_dint2= cld_dint[cld_dint$OTU%in%names_anova_int,]
contr_dint2= contr_dint[contr_dint$OTU%in%names_anova_int,]
lsm_dint2= lsm_dint[lsm_dint$OTU%in%names_anova_int,]
cld_dclass2= cld_dclass[cld_dclass$OTU%in%names_anova_class,]
contr_dclass2= contr_dclass[contr_dclass$OTU%in%names_anova_class,]
lsm_dclass2= lsm_dclass[lsm_dclass$OTU%in%names_anova_class,]
dput(as.character(unique(contr_dclass2$OTU)))

cld_dtime2= cld_dtime[cld_dtime$OTU%in%names_anova_time,]
contr_dtime2= contr_dtime[contr_dtime$OTU%in%names_anova_time,]
lsm_dtime2= lsm_dtime[lsm_dtime$OTU%in%names_anova_time,]
dput(as.character(unique(contr_dtime2$OTU)))

#Combining final result to export
anova1=rbind(anova_int, anova_time1, anova_class1)

#Export
library(openxlsx)
results <- list(
"anova" = anova1,
"lsmeans_time"=lsm_dtime2, "letters_time" = cld_dtime2, "contrast_time"=
contr_dtime2,
"lsmeans_class"=lsm_dclass2,"letters_class"= cld_dclass2,"contrast_class"=
contr_dclass2,
"lsmeans_int"=lsm_dint2,"letters_int"= cld_dint2, "contrast_int"=
contr_dint2)

write.xlsx(results, file = "code/Anova_POISSON_OFFSET_Results.xlsx")
```
